# Supplementary material for: A protein structure-guided covalent scaffold selectively targets the B1 and B2 subclass metallo-β-lactamases
Source: Royal Society of Chemistry journal article supplement (doi:10.1039/c8cc01067f), 2018-01-01
Supplement: c8cc01067f1.xlsx [file c8cc01067f1.xlsx]

## Sheet: Proteins
Checked	Master	Accession	Description	Coverage [%]	# Peptides	# PSMs	# Unique Peptides	# Protein Groups	# AAs	MW [kDa]	calc. pI	Score Sequest HT: Sequest HT	# Peptides (by Search Engine): Sequest HT
FALSE	Master Protein	4EYL	A Chain A, 1 Beta-lactamase NDM-1	94	113	186	113	1	234	24.8	6.25	565.82	113
	Checked	Confidence	Sequence	Modifications	# Protein Groups	# Proteins	# PSMs	Master Protein Accessions	# Missed Cleavages	Theo. MH+ [Da]	Confidence (by Search Engine): Sequest HT	XCorr (by Search Engine): Sequest HT
	FALSE	High	AAFPKASMIVMSHSAPD		1	1	1	4EYL	1	1759.85	High	4.51
		Checked	Confidence	Identifying Node	PSM Ambiguity	Annotated Sequence	Modifications	# Protein Groups	# Proteins	Master Protein Accessions	Protein Accessions	# Missed Cleavages	Charge	DeltaScore	DeltaCn	Rank	Search Engine Rank	m/z [Da]	MH+ [Da]	Theo. MH+ [Da]	DeltaM [ppm]	Deltam/z [Da]	Activation Type	MS Order	Isolation Interference [%]	Ion Inject Time [ms]	RT [min]	First Scan	Spectrum File	File ID	XCorr
		FALSE	High	Sequest HT (A2)	Unambiguous	AAFPKASMIVMSHSAPD		1	1	4EYL	4EYL	1	3	1	0	1	1	587.29	1759.85	1759.85	2	0.00117	HCD (High Energy Collision Dissociation)	MS2	5.33009	22.987	24.8299	12232	nR-GLU+Try_180322142308.raw	F18	4.51
	FALSE	High	QLAPNVWQHTSYLD		1	1	1	4EYL	0	1671.81	High	2.77
		Checked	Confidence	Identifying Node	PSM Ambiguity	Annotated Sequence	Modifications	# Protein Groups	# Proteins	Master Protein Accessions	Protein Accessions	# Missed Cleavages	Charge	DeltaScore	DeltaCn	Rank	Search Engine Rank	m/z [Da]	MH+ [Da]	Theo. MH+ [Da]	DeltaM [ppm]	Deltam/z [Da]	Activation Type	MS Order	Isolation Interference [%]	Ion Inject Time [ms]	RT [min]	First Scan	Spectrum File	File ID	XCorr
		FALSE	High	Sequest HT (A2)	Unambiguous	QLAPNVWQHTSYLD		1	1	4EYL	4EYL	0	2	1	0	1	1	836.41	1671.81	1671.81	-0.22	-0.00018	HCD (High Energy Collision Dissociation)	MS2	13.7709	45	27.4363	13937	nR-GLU+Try_180322142308.raw	F18	2.77
	FALSE	High	QEINLPVALAVVTHAHQDK		1	1	3	4EYL	2	2083.13	High	7.23
		Checked	Confidence	Identifying Node	PSM Ambiguity	Annotated Sequence	Modifications	# Protein Groups	# Proteins	Master Protein Accessions	Protein Accessions	# Missed Cleavages	Charge	DeltaScore	DeltaCn	Rank	Search Engine Rank	m/z [Da]	MH+ [Da]	Theo. MH+ [Da]	DeltaM [ppm]	Deltam/z [Da]	Activation Type	MS Order	Isolation Interference [%]	Ion Inject Time [ms]	RT [min]	First Scan	Spectrum File	File ID	XCorr
		FALSE	High	Sequest HT (A2)	Unambiguous	QEINLPVALAVVTHAHQDK		1	1	4EYL	4EYL	2	3	0.7898	0	1	1	695.048	2083.13	2083.13	0.48	0.00033	HCD (High Energy Collision Dissociation)	MS2	9.82023	15.809	27.9015	14282	nR-GLU+Try_180322142308.raw	F18	7.23
		FALSE	High	Sequest HT (A2)	Unambiguous	QEINLPVALAVVTHAHQDK		1	1	4EYL	4EYL	2	4	0.83	0	1	1	521.538	2083.13	2083.13	1.21	0.00063	HCD (High Energy Collision Dissociation)	MS2	0	39.735	27.9246	14295	nR-GLU+Try_180322142308.raw	F18	5.94
		FALSE	High	Sequest HT (A2)	Unambiguous	QEINLPVALAVVTHAHQDK		1	1	4EYL	4EYL	2	2	0.856	0	1	1	1042.07	2083.14	2083.13	3.62	0.00377	HCD (High Energy Collision Dissociation)	MS2	0	26.841	27.9356	14302	nR-GLU+Try_180322142308.raw	F18	5.14
	FALSE	High	NGWVEPATAPNFGPLK		1	1	1	4EYL	1	1697.86	High	2.64
		Checked	Confidence	Identifying Node	PSM Ambiguity	Annotated Sequence	Modifications	# Protein Groups	# Proteins	Master Protein Accessions	Protein Accessions	# Missed Cleavages	Charge	DeltaScore	DeltaCn	Rank	Search Engine Rank	m/z [Da]	MH+ [Da]	Theo. MH+ [Da]	DeltaM [ppm]	Deltam/z [Da]	Activation Type	MS Order	Isolation Interference [%]	Ion Inject Time [ms]	RT [min]	First Scan	Spectrum File	File ID	XCorr
		FALSE	High	Sequest HT (A2)	Unambiguous	NGWVEPATAPNFGPLK		1	1	4EYL	4EYL	1	2	1	0	1	1	849.441	1697.88	1697.86	6.16	0.00523	HCD (High Energy Collision Dissociation)	MS2	0	45	27.8464	14248	nR-GLU+Try_180322142308.raw	F18	2.64
	FALSE	High	NGLIVRD		1	1	1	4EYL	1	786.447	High	1.92
		Checked	Confidence	Identifying Node	PSM Ambiguity	Annotated Sequence	Modifications	# Protein Groups	# Proteins	Master Protein Accessions	Protein Accessions	# Missed Cleavages	Charge	DeltaScore	DeltaCn	Rank	Search Engine Rank	m/z [Da]	MH+ [Da]	Theo. MH+ [Da]	DeltaM [ppm]	Deltam/z [Da]	Activation Type	MS Order	Isolation Interference [%]	Ion Inject Time [ms]	RT [min]	First Scan	Spectrum File	File ID	XCorr
		FALSE	High	Sequest HT (A2)	Unambiguous	NGLIVRD		1	1	4EYL	4EYL	1	2	1	0	1	1	393.728	786.45	786.447	3.49	0.00137	HCD (High Energy Collision Dissociation)	MS2	38.6425	45	18.4956	7754	nR-GLU+Try_180322142308.raw	F18	1.92
	FALSE	High	NALSNQLAPQE		1	1	6	4EYL	0	1184.59	High	2.82
		Checked	Confidence	Identifying Node	PSM Ambiguity	Annotated Sequence	Modifications	# Protein Groups	# Proteins	Master Protein Accessions	Protein Accessions	# Missed Cleavages	Charge	DeltaScore	DeltaCn	Rank	Search Engine Rank	m/z [Da]	MH+ [Da]	Theo. MH+ [Da]	DeltaM [ppm]	Deltam/z [Da]	Activation Type	MS Order	Isolation Interference [%]	Ion Inject Time [ms]	RT [min]	First Scan	Spectrum File	File ID	XCorr
		FALSE	High	Sequest HT (A2)	Unambiguous	NALSNQLAPQE		1	1	4EYL	4EYL	0	2	1	0	1	1	592.799	1184.59	1184.59	0.65	0.00038	HCD (High Energy Collision Dissociation)	MS2	31.0257	30.246	21.7919	10141	nR-GLU+Try_180322142308.raw	F18	2.82
		FALSE	High	Sequest HT (A2)	Unambiguous	NALSNQLAPQE		1	1	4EYL	4EYL	0	2	1	0	1	1	592.8	1184.59	1184.59	2.5	0.00148	HCD (High Energy Collision Dissociation)	MS2	0	45	24.0181	11840	nR-GLU+Try_180322142308.raw	F18	2.74
		FALSE	High	Sequest HT (A2)	Unambiguous	NALSNQLAPQE		1	1	4EYL	4EYL	0	2	1	0	1	1	592.8	1184.59	1184.59	1.57	0.00093	HCD (High Energy Collision Dissociation)	MS2	24.3754	45	28.9215	15010	nR-GLU+Try_180322142308.raw	F18	2.45
		FALSE	High	Sequest HT (A2)	Unambiguous	NALSNQLAPQE		1	1	4EYL	4EYL	0	2	1	0	1	1	592.799	1184.59	1184.59	0.65	0.00038	HCD (High Energy Collision Dissociation)	MS2	0	42.931	27.9187	14292	nR-GLU+Try_180322142308.raw	F18	2.27
		FALSE	High	Sequest HT (A2)	Unambiguous	NALSNQLAPQE		1	1	4EYL	4EYL	0	2	1	0	1	1	592.801	1184.6	1184.59	3.84	0.00227	HCD (High Energy Collision Dissociation)	MS2	56.2559	39.077	26.6311	13403	nR-GLU+Try_180322142308.raw	F18	2.23
		FALSE	High	Sequest HT (A2)	Unambiguous	NALSNQLAPQE		1	1	4EYL	4EYL	0	2	1	0	1	1	592.8	1184.59	1184.59	1.88	0.00111	HCD (High Energy Collision Dissociation)	MS2	35.684	45	29.9268	15522	nR-GLU+Try_180322142308.raw	F18	2.2
	FALSE	High	MSHSAPDSRAAITHTAR		1	1	2	4EYL	2	1808.88	High	4.42
		Checked	Confidence	Identifying Node	PSM Ambiguity	Annotated Sequence	Modifications	# Protein Groups	# Proteins	Master Protein Accessions	Protein Accessions	# Missed Cleavages	Charge	DeltaScore	DeltaCn	Rank	Search Engine Rank	m/z [Da]	MH+ [Da]	Theo. MH+ [Da]	DeltaM [ppm]	Deltam/z [Da]	Activation Type	MS Order	Isolation Interference [%]	Ion Inject Time [ms]	RT [min]	First Scan	Spectrum File	File ID	XCorr
		FALSE	High	Sequest HT (A2)	Unambiguous	MSHSAPDSRAAITHTAR		1	1	4EYL	4EYL	2	4	1	0	1	1	452.977	1808.88	1808.88	1.59	0.00072	HCD (High Energy Collision Dissociation)	MS2	0	41.916	13.9474	4841	nR-GLU+Try_180322142308.raw	F18	4.42
		FALSE	High	Sequest HT (A2)	Unambiguous	MSHSAPDSRAAITHTAR		1	1	4EYL	4EYL	2	3	1	0	1	1	603.635	1808.89	1808.88	3.96	0.00239	HCD (High Energy Collision Dissociation)	MS2	25.5966	45	13.9356	4835	nR-GLU+Try_180322142308.raw	F18	3.3
	FALSE	High	MIVMSHSAPDSRAAITHTAR		1	1	1	4EYL	2	2152.07	High	4.38
		Checked	Confidence	Identifying Node	PSM Ambiguity	Annotated Sequence	Modifications	# Protein Groups	# Proteins	Master Protein Accessions	Protein Accessions	# Missed Cleavages	Charge	DeltaScore	DeltaCn	Rank	Search Engine Rank	m/z [Da]	MH+ [Da]	Theo. MH+ [Da]	DeltaM [ppm]	Deltam/z [Da]	Activation Type	MS Order	Isolation Interference [%]	Ion Inject Time [ms]	RT [min]	First Scan	Spectrum File	File ID	XCorr
		FALSE	High	Sequest HT (A2)	Unambiguous	MIVMSHSAPDSRAAITHTAR		1	1	4EYL	4EYL	2	3	1	0	1	1	718.033	2152.08	2152.07	4.08	0.00292	HCD (High Energy Collision Dissociation)	MS2	44.4989	22.074	18.0108	7411	nR-GLU+Try_180322142308.raw	F18	4.38
	FALSE	High	MIVMSHSAPDSR		1	1	1	4EYL	1	1330.62	High	3.65
		Checked	Confidence	Identifying Node	PSM Ambiguity	Annotated Sequence	Modifications	# Protein Groups	# Proteins	Master Protein Accessions	Protein Accessions	# Missed Cleavages	Charge	DeltaScore	DeltaCn	Rank	Search Engine Rank	m/z [Da]	MH+ [Da]	Theo. MH+ [Da]	DeltaM [ppm]	Deltam/z [Da]	Activation Type	MS Order	Isolation Interference [%]	Ion Inject Time [ms]	RT [min]	First Scan	Spectrum File	File ID	XCorr
		FALSE	High	Sequest HT (A2)	Unambiguous	MIVMSHSAPDSR		1	1	4EYL	4EYL	1	2	1	0	1	1	665.817	1330.63	1330.62	1.45	0.00096	HCD (High Energy Collision Dissociation)	MS2	16.6943	40.387	17.4411	7007	nR-GLU+Try_180322142308.raw	F18	3.65
	FALSE	High	MIVMSHSAPD		1	1	1	4EYL	0	1087.49	High	2.4
		Checked	Confidence	Identifying Node	PSM Ambiguity	Annotated Sequence	Modifications	# Protein Groups	# Proteins	Master Protein Accessions	Protein Accessions	# Missed Cleavages	Charge	DeltaScore	DeltaCn	Rank	Search Engine Rank	m/z [Da]	MH+ [Da]	Theo. MH+ [Da]	DeltaM [ppm]	Deltam/z [Da]	Activation Type	MS Order	Isolation Interference [%]	Ion Inject Time [ms]	RT [min]	First Scan	Spectrum File	File ID	XCorr
		FALSE	High	Sequest HT (A2)	Unambiguous	MIVMSHSAPD		1	1	4EYL	4EYL	0	2	1	0	1	1	544.25	1087.49	1087.49	1.85	0.00101	HCD (High Energy Collision Dissociation)	MS2	18.3692	18.575	19.5352	8551	nR-GLU+Try_180322142308.raw	F18	2.4
	FALSE	High	MGGMDALHAAGIAT		1	1	1	4EYL	1	1315.61	High	2.52
		Checked	Confidence	Identifying Node	PSM Ambiguity	Annotated Sequence	Modifications	# Protein Groups	# Proteins	Master Protein Accessions	Protein Accessions	# Missed Cleavages	Charge	DeltaScore	DeltaCn	Rank	Search Engine Rank	m/z [Da]	MH+ [Da]	Theo. MH+ [Da]	DeltaM [ppm]	Deltam/z [Da]	Activation Type	MS Order	Isolation Interference [%]	Ion Inject Time [ms]	RT [min]	First Scan	Spectrum File	File ID	XCorr
		FALSE	High	Sequest HT (A2)	Unambiguous	MGGMDALHAAGIAT		1	1	4EYL	4EYL	1	2	1	0	1	1	658.311	1315.61	1315.61	1.03	0.00068	HCD (High Energy Collision Dissociation)	MS2	0	45	26.5209	13335	nR-GLU+Try_180322142308.raw	F18	2.52
	FALSE	High	IVMSHSAPDSR		1	1	2	4EYL	1	1199.58	High	2.96
		Checked	Confidence	Identifying Node	PSM Ambiguity	Annotated Sequence	Modifications	# Protein Groups	# Proteins	Master Protein Accessions	Protein Accessions	# Missed Cleavages	Charge	DeltaScore	DeltaCn	Rank	Search Engine Rank	m/z [Da]	MH+ [Da]	Theo. MH+ [Da]	DeltaM [ppm]	Deltam/z [Da]	Activation Type	MS Order	Isolation Interference [%]	Ion Inject Time [ms]	RT [min]	First Scan	Spectrum File	File ID	XCorr
		FALSE	High	Sequest HT (A2)	Unambiguous	IVMSHSAPDSR		1	1	4EYL	4EYL	1	2	1	0	1	1	600.297	1199.59	1199.58	2.18	0.00131	HCD (High Energy Collision Dissociation)	MS2	0	45	14.5147	5228	nR-GLU+Try_180322142308.raw	F18	2.96
		FALSE	High	Sequest HT (A2)	Unambiguous	IVMSHSAPDSR		1	1	4EYL	4EYL	1	3	1	0	1	1	400.533	1199.59	1199.58	1.33	0.00053	HCD (High Energy Collision Dissociation)	MS2	0	45	14.5424	5247	nR-GLU+Try_180322142308.raw	F18	2.52
	FALSE	High	QILNWIK		1	1	1	4EYL	0	914.546	High	2.15
		Checked	Confidence	Identifying Node	PSM Ambiguity	Annotated Sequence	Modifications	# Protein Groups	# Proteins	Master Protein Accessions	Protein Accessions	# Missed Cleavages	Charge	DeltaScore	DeltaCn	Rank	Search Engine Rank	m/z [Da]	MH+ [Da]	Theo. MH+ [Da]	DeltaM [ppm]	Deltam/z [Da]	Activation Type	MS Order	Isolation Interference [%]	Ion Inject Time [ms]	RT [min]	First Scan	Spectrum File	File ID	XCorr
		FALSE	High	Sequest HT (A2)	Unambiguous	QILNWIK		1	1	4EYL	4EYL	0	2	1	0	1	1	457.777	914.547	914.546	1.48	0.00068	HCD (High Energy Collision Dissociation)	MS2	9.31914	34.474	27.7248	14152	nR-GLU+Try_180322142308.raw	F18	2.15
	FALSE	High	LVFRQLAPNVWQHTS		1	1	1	4EYL	1	1795.96	High	2.69
		Checked	Confidence	Identifying Node	PSM Ambiguity	Annotated Sequence	Modifications	# Protein Groups	# Proteins	Master Protein Accessions	Protein Accessions	# Missed Cleavages	Charge	DeltaScore	DeltaCn	Rank	Search Engine Rank	m/z [Da]	MH+ [Da]	Theo. MH+ [Da]	DeltaM [ppm]	Deltam/z [Da]	Activation Type	MS Order	Isolation Interference [%]	Ion Inject Time [ms]	RT [min]	First Scan	Spectrum File	File ID	XCorr
		FALSE	High	Sequest HT (A2)	Unambiguous	LVFRQLAPNVWQHTS		1	1	4EYL	4EYL	1	2	1	0	1	1	898.485	1795.96	1795.96	1.72	0.00155	HCD (High Energy Collision Dissociation)	MS2	0	45	27.349	13872	nR-GLU+Try_180322142308.raw	F18	2.69
	FALSE	High	LVFRQLAPN		1	1	1	4EYL	1	1057.62	High	2.26
		Checked	Confidence	Identifying Node	PSM Ambiguity	Annotated Sequence	Modifications	# Protein Groups	# Proteins	Master Protein Accessions	Protein Accessions	# Missed Cleavages	Charge	DeltaScore	DeltaCn	Rank	Search Engine Rank	m/z [Da]	MH+ [Da]	Theo. MH+ [Da]	DeltaM [ppm]	Deltam/z [Da]	Activation Type	MS Order	Isolation Interference [%]	Ion Inject Time [ms]	RT [min]	First Scan	Spectrum File	File ID	XCorr
		FALSE	High	Sequest HT (A2)	Unambiguous	LVFRQLAPN		1	1	4EYL	4EYL	1	2	1	0	1	1	529.313	1057.62	1057.62	3.11	0.00164	HCD (High Energy Collision Dissociation)	MS2	0	35.223	24.0114	11835	nR-GLU+Try_180322142308.raw	F18	2.26
	FALSE	High	LSNQLAPQE		1	1	1	4EYL	0	999.511	High	2.32
		Checked	Confidence	Identifying Node	PSM Ambiguity	Annotated Sequence	Modifications	# Protein Groups	# Proteins	Master Protein Accessions	Protein Accessions	# Missed Cleavages	Charge	DeltaScore	DeltaCn	Rank	Search Engine Rank	m/z [Da]	MH+ [Da]	Theo. MH+ [Da]	DeltaM [ppm]	Deltam/z [Da]	Activation Type	MS Order	Isolation Interference [%]	Ion Inject Time [ms]	RT [min]	First Scan	Spectrum File	File ID	XCorr
		FALSE	High	Sequest HT (A2)	Unambiguous	LSNQLAPQE		1	1	4EYL	4EYL	0	2	1	0	1	1	500.26	999.512	999.511	1.83	0.00091	HCD (High Energy Collision Dissociation)	MS2	9.64015	45	19.28	8348	nR-GLU+Try_180322142308.raw	F18	2.32
	FALSE	High	INLPVALAVVTHAHQDKM		1	1	3	4EYL	2	1957.07	High	5.33
		Checked	Confidence	Identifying Node	PSM Ambiguity	Annotated Sequence	Modifications	# Protein Groups	# Proteins	Master Protein Accessions	Protein Accessions	# Missed Cleavages	Charge	DeltaScore	DeltaCn	Rank	Search Engine Rank	m/z [Da]	MH+ [Da]	Theo. MH+ [Da]	DeltaM [ppm]	Deltam/z [Da]	Activation Type	MS Order	Isolation Interference [%]	Ion Inject Time [ms]	RT [min]	First Scan	Spectrum File	File ID	XCorr
		FALSE	High	Sequest HT (A2)	Unambiguous	INLPVALAVVTHAHQDKM		1	1	4EYL	4EYL	2	3	1	0	1	1	653.028	1957.07	1957.07	0.74	0.00048	HCD (High Energy Collision Dissociation)	MS2	0	28.232	27.9268	14296	nR-GLU+Try_180322142308.raw	F18	5.33
		FALSE	High	Sequest HT (A2)	Unambiguous	INLPVALAVVTHAHQDKM		1	1	4EYL	4EYL	2	4	1	0	1	1	490.024	1957.07	1957.07	2.1	0.00103	HCD (High Energy Collision Dissociation)	MS2	31.3628	45	27.9499	14312	nR-GLU+Try_180322142308.raw	F18	5.16
		FALSE	High	Sequest HT (A2)	Unambiguous	INLPVALAVVTHAHQDKM		1	1	4EYL	4EYL	2	2	1	0	1	1	979.04	1957.07	1957.07	1.74	0.00171	HCD (High Energy Collision Dissociation)	MS2	0	45	27.9622	14321	nR-GLU+Try_180322142308.raw	F18	4.29
	FALSE	High	INLPVALAVVTHAHQDK		1	1	1	4EYL	1	1826.03	High	2.79
		Checked	Confidence	Identifying Node	PSM Ambiguity	Annotated Sequence	Modifications	# Protein Groups	# Proteins	Master Protein Accessions	Protein Accessions	# Missed Cleavages	Charge	DeltaScore	DeltaCn	Rank	Search Engine Rank	m/z [Da]	MH+ [Da]	Theo. MH+ [Da]	DeltaM [ppm]	Deltam/z [Da]	Activation Type	MS Order	Isolation Interference [%]	Ion Inject Time [ms]	RT [min]	First Scan	Spectrum File	File ID	XCorr
		FALSE	High	Sequest HT (A2)	Unambiguous	INLPVALAVVTHAHQDK		1	1	4EYL	4EYL	1	2	1	0	1	1	913.52	1826.03	1826.03	2.05	0.00187	HCD (High Energy Collision Dissociation)	MS2	59.4815	45	27.6645	14104	nR-GLU+Try_180322142308.raw	F18	2.79
	FALSE	High	INLPVALAVVTHAHQD		1	1	2	4EYL	0	1697.93	High	4.33
		Checked	Confidence	Identifying Node	PSM Ambiguity	Annotated Sequence	Modifications	# Protein Groups	# Proteins	Master Protein Accessions	Protein Accessions	# Missed Cleavages	Charge	DeltaScore	DeltaCn	Rank	Search Engine Rank	m/z [Da]	MH+ [Da]	Theo. MH+ [Da]	DeltaM [ppm]	Deltam/z [Da]	Activation Type	MS Order	Isolation Interference [%]	Ion Inject Time [ms]	RT [min]	First Scan	Spectrum File	File ID	XCorr
		FALSE	High	Sequest HT (A2)	Unambiguous	INLPVALAVVTHAHQD		1	1	4EYL	4EYL	0	3	1	0	1	1	566.65	1697.94	1697.93	1.61	0.00091	HCD (High Energy Collision Dissociation)	MS2	16.6371	35.86	28.1537	14476	nR-GLU+Try_180322142308.raw	F18	4.33
		FALSE	High	Sequest HT (A2)	Unambiguous	INLPVALAVVTHAHQD		1	1	4EYL	4EYL	0	2	1	0	1	1	849.471	1697.94	1697.93	1.12	0.00095	HCD (High Energy Collision Dissociation)	MS2	8.02096	45	28.1405	14466	nR-GLU+Try_180322142308.raw	F18	4.29
	FALSE	High	INLPVALAVVTHAHQ		1	1	1	4EYL	0	1582.91	High	3.56
		Checked	Confidence	Identifying Node	PSM Ambiguity	Annotated Sequence	Modifications	# Protein Groups	# Proteins	Master Protein Accessions	Protein Accessions	# Missed Cleavages	Charge	DeltaScore	DeltaCn	Rank	Search Engine Rank	m/z [Da]	MH+ [Da]	Theo. MH+ [Da]	DeltaM [ppm]	Deltam/z [Da]	Activation Type	MS Order	Isolation Interference [%]	Ion Inject Time [ms]	RT [min]	First Scan	Spectrum File	File ID	XCorr
		FALSE	High	Sequest HT (A2)	Unambiguous	INLPVALAVVTHAHQ		1	1	4EYL	4EYL	0	2	1	0	1	1	791.963	1582.92	1582.91	7.35	0.00581	HCD (High Energy Collision Dissociation)	MS2	8.05592	45	28.1794	14497	nR-GLU+Try_180322142308.raw	F18	3.56
	FALSE	High	INLPVALAVVTHAH		1	1	2	4EYL	0	1454.85	High	3.51
		Checked	Confidence	Identifying Node	PSM Ambiguity	Annotated Sequence	Modifications	# Protein Groups	# Proteins	Master Protein Accessions	Protein Accessions	# Missed Cleavages	Charge	DeltaScore	DeltaCn	Rank	Search Engine Rank	m/z [Da]	MH+ [Da]	Theo. MH+ [Da]	DeltaM [ppm]	Deltam/z [Da]	Activation Type	MS Order	Isolation Interference [%]	Ion Inject Time [ms]	RT [min]	First Scan	Spectrum File	File ID	XCorr
		FALSE	High	Sequest HT (A2)	Unambiguous	INLPVALAVVTHAH		1	1	4EYL	4EYL	0	3	1	0	1	1	485.622	1454.85	1454.85	2.02	0.00098	HCD (High Energy Collision Dissociation)	MS2	0	45	28.2897	14582	nR-GLU+Try_180322142308.raw	F18	3.51
		FALSE	High	Sequest HT (A2)	Unambiguous	INLPVALAVVTHAH		1	1	4EYL	4EYL	0	2	1	0	1	1	727.926	1454.85	1454.85	-1.67	-0.00121	HCD (High Energy Collision Dissociation)	MS2	0	45	28.2603	14560	nR-GLU+Try_180322142308.raw	F18	2.32
	FALSE	High	INLPVALAVVTH		1	1	1	4EYL	0	1246.75	High	3.28
		Checked	Confidence	Identifying Node	PSM Ambiguity	Annotated Sequence	Modifications	# Protein Groups	# Proteins	Master Protein Accessions	Protein Accessions	# Missed Cleavages	Charge	DeltaScore	DeltaCn	Rank	Search Engine Rank	m/z [Da]	MH+ [Da]	Theo. MH+ [Da]	DeltaM [ppm]	Deltam/z [Da]	Activation Type	MS Order	Isolation Interference [%]	Ion Inject Time [ms]	RT [min]	First Scan	Spectrum File	File ID	XCorr
		FALSE	High	Sequest HT (A2)	Unambiguous	INLPVALAVVTH		1	1	4EYL	4EYL	0	2	1	0	1	1	623.881	1246.75	1246.75	1.94	0.00121	HCD (High Energy Collision Dissociation)	MS2	6.2316	35.684	28.669	14847	nR-GLU+Try_180322142308.raw	F18	3.28
	FALSE	High	ILNWIKQE		1	1	1	4EYL	1	1043.59	High	2.12
		Checked	Confidence	Identifying Node	PSM Ambiguity	Annotated Sequence	Modifications	# Protein Groups	# Proteins	Master Protein Accessions	Protein Accessions	# Missed Cleavages	Charge	DeltaScore	DeltaCn	Rank	Search Engine Rank	m/z [Da]	MH+ [Da]	Theo. MH+ [Da]	DeltaM [ppm]	Deltam/z [Da]	Activation Type	MS Order	Isolation Interference [%]	Ion Inject Time [ms]	RT [min]	First Scan	Spectrum File	File ID	XCorr
		FALSE	High	Sequest HT (A2)	Unambiguous	ILNWIKQE		1	1	4EYL	4EYL	1	2	0.7689	0	1	1	522.298	1043.59	1043.59	0.84	0.00044	HCD (High Energy Collision Dissociation)	MS2	0	45	25.9543	12958	nR-GLU+Try_180322142308.raw	F18	2.12
	FALSE	High	LAVVTHAHQD		1	1	1	4EYL	0	1090.56	High	2.89
		Checked	Confidence	Identifying Node	PSM Ambiguity	Annotated Sequence	Modifications	# Protein Groups	# Proteins	Master Protein Accessions	Protein Accessions	# Missed Cleavages	Charge	DeltaScore	DeltaCn	Rank	Search Engine Rank	m/z [Da]	MH+ [Da]	Theo. MH+ [Da]	DeltaM [ppm]	Deltam/z [Da]	Activation Type	MS Order	Isolation Interference [%]	Ion Inject Time [ms]	RT [min]	First Scan	Spectrum File	File ID	XCorr
		FALSE	High	Sequest HT (A2)	Unambiguous	LAVVTHAHQD		1	1	4EYL	4EYL	0	2	1	0	1	1	545.786	1090.57	1090.56	1.26	0.00069	HCD (High Energy Collision Dissociation)	MS2	43.1691	45	14.3556	5113	nR-GLU+Try_180322142308.raw	F18	2.89
	FALSE	High	LAPNVWQHTSYLD		1	1	1	4EYL	0	1543.75	High	2.75
		Checked	Confidence	Identifying Node	PSM Ambiguity	Annotated Sequence	Modifications	# Protein Groups	# Proteins	Master Protein Accessions	Protein Accessions	# Missed Cleavages	Charge	DeltaScore	DeltaCn	Rank	Search Engine Rank	m/z [Da]	MH+ [Da]	Theo. MH+ [Da]	DeltaM [ppm]	Deltam/z [Da]	Activation Type	MS Order	Isolation Interference [%]	Ion Inject Time [ms]	RT [min]	First Scan	Spectrum File	File ID	XCorr
		FALSE	High	Sequest HT (A2)	Unambiguous	LAPNVWQHTSYLD		1	1	4EYL	4EYL	0	2	1	0	1	1	772.383	1543.76	1543.75	3	0.00231	HCD (High Energy Collision Dissociation)	MS2	23.5717	41.923	27.0185	13650	nR-GLU+Try_180322142308.raw	F18	2.75
	FALSE	High	LVFRQLAPNVWQHT		1	1	1	4EYL	1	1708.93	High	3.6
		Checked	Confidence	Identifying Node	PSM Ambiguity	Annotated Sequence	Modifications	# Protein Groups	# Proteins	Master Protein Accessions	Protein Accessions	# Missed Cleavages	Charge	DeltaScore	DeltaCn	Rank	Search Engine Rank	m/z [Da]	MH+ [Da]	Theo. MH+ [Da]	DeltaM [ppm]	Deltam/z [Da]	Activation Type	MS Order	Isolation Interference [%]	Ion Inject Time [ms]	RT [min]	First Scan	Spectrum File	File ID	XCorr
		FALSE	High	Sequest HT (A2)	Unambiguous	LVFRQLAPNVWQHT		1	1	4EYL	4EYL	1	3	1	0	1	1	570.316	1708.93	1708.93	2.83	0.00161	HCD (High Energy Collision Dissociation)	MS2	19.022	45	27.5399	14012	nR-GLU+Try_180322142308.raw	F18	3.6
	FALSE	High	QILNWIKQE		1	1	1	4EYL	1	1171.65	High	2.56
		Checked	Confidence	Identifying Node	PSM Ambiguity	Annotated Sequence	Modifications	# Protein Groups	# Proteins	Master Protein Accessions	Protein Accessions	# Missed Cleavages	Charge	DeltaScore	DeltaCn	Rank	Search Engine Rank	m/z [Da]	MH+ [Da]	Theo. MH+ [Da]	DeltaM [ppm]	Deltam/z [Da]	Activation Type	MS Order	Isolation Interference [%]	Ion Inject Time [ms]	RT [min]	First Scan	Spectrum File	File ID	XCorr
		FALSE	High	Sequest HT (A2)	Unambiguous	QILNWIKQE		1	1	4EYL	4EYL	1	2	0.668	0	1	1	586.329	1171.65	1171.65	2.84	0.00167	HCD (High Energy Collision Dissociation)	MS2	47.4255	2.793	27.3288	13858	nR-GLU+Try_180322142308.raw	F18	2.56
	FALSE	High	SAPDSRAAITHTAR		1	1	2	4EYL	2	1453.75	High	3.62
		Checked	Confidence	Identifying Node	PSM Ambiguity	Annotated Sequence	Modifications	# Protein Groups	# Proteins	Master Protein Accessions	Protein Accessions	# Missed Cleavages	Charge	DeltaScore	DeltaCn	Rank	Search Engine Rank	m/z [Da]	MH+ [Da]	Theo. MH+ [Da]	DeltaM [ppm]	Deltam/z [Da]	Activation Type	MS Order	Isolation Interference [%]	Ion Inject Time [ms]	RT [min]	First Scan	Spectrum File	File ID	XCorr
		FALSE	High	Sequest HT (A2)	Unambiguous	SAPDSRAAITHTAR		1	1	4EYL	4EYL	2	3	1	0	1	1	485.256	1453.75	1453.75	2.16	0.00105	HCD (High Energy Collision Dissociation)	MS2	36.1041	17.609	13.7055	4714	nR-GLU+Try_180322142308.raw	F18	3.62
		FALSE	High	Sequest HT (A2)	Unambiguous	SAPDSRAAITHTAR		1	1	4EYL	4EYL	2	2	1	0	1	1	727.381	1453.76	1453.75	3.3	0.0024	HCD (High Energy Collision Dissociation)	MS2	11.0011	45	13.7289	4732	nR-GLU+Try_180322142308.raw	F18	2.28
	FALSE	High	SHSAPDSRAAITHTAR		1	1	1	4EYL	2	1677.84	High	3.58
		Checked	Confidence	Identifying Node	PSM Ambiguity	Annotated Sequence	Modifications	# Protein Groups	# Proteins	Master Protein Accessions	Protein Accessions	# Missed Cleavages	Charge	DeltaScore	DeltaCn	Rank	Search Engine Rank	m/z [Da]	MH+ [Da]	Theo. MH+ [Da]	DeltaM [ppm]	Deltam/z [Da]	Activation Type	MS Order	Isolation Interference [%]	Ion Inject Time [ms]	RT [min]	First Scan	Spectrum File	File ID	XCorr
		FALSE	High	Sequest HT (A2)	Unambiguous	SHSAPDSRAAITHTAR		1	1	4EYL	4EYL	2	4	1	0	1	1	420.217	1677.84	1677.84	1.61	0.00068	HCD (High Energy Collision Dissociation)	MS2	11.9519	45	12.8761	4222	nR-GLU+Try_180322142308.raw	F18	3.58
	FALSE	High	VVTHAHQDKMGGMD		1	1	2	4EYL	2	1525.69	High	3.07
		Checked	Confidence	Identifying Node	PSM Ambiguity	Annotated Sequence	Modifications	# Protein Groups	# Proteins	Master Protein Accessions	Protein Accessions	# Missed Cleavages	Charge	DeltaScore	DeltaCn	Rank	Search Engine Rank	m/z [Da]	MH+ [Da]	Theo. MH+ [Da]	DeltaM [ppm]	Deltam/z [Da]	Activation Type	MS Order	Isolation Interference [%]	Ion Inject Time [ms]	RT [min]	First Scan	Spectrum File	File ID	XCorr
		FALSE	High	Sequest HT (A2)	Unambiguous	VVTHAHQDKMGGMD		1	1	4EYL	4EYL	2	2	1	0	1	1	763.35	1525.69	1525.69	2.75	0.00209	HCD (High Energy Collision Dissociation)	MS2	0	45	13.5203	4606	nR-GLU+Try_180322142308.raw	F18	3.07
		FALSE	High	Sequest HT (A2)	Unambiguous	VVTHAHQDKMGGMD		1	1	4EYL	4EYL	2	3	1	0	1	1	509.235	1525.69	1525.69	1.06	0.00054	HCD (High Energy Collision Dissociation)	MS2	28.663	45	13.5157	4603	nR-GLU+Try_180322142308.raw	F18	2.32
	FALSE	High	VFYPGPGHTSDNITV		1	1	1	4EYL	1	1603.78	High	2.02
		Checked	Confidence	Identifying Node	PSM Ambiguity	Annotated Sequence	Modifications	# Protein Groups	# Proteins	Master Protein Accessions	Protein Accessions	# Missed Cleavages	Charge	DeltaScore	DeltaCn	Rank	Search Engine Rank	m/z [Da]	MH+ [Da]	Theo. MH+ [Da]	DeltaM [ppm]	Deltam/z [Da]	Activation Type	MS Order	Isolation Interference [%]	Ion Inject Time [ms]	RT [min]	First Scan	Spectrum File	File ID	XCorr
		FALSE	High	Sequest HT (A2)	Unambiguous	VFYPGPGHTSDNITV		1	1	4EYL	4EYL	1	2	1	0	1	1	802.393	1603.78	1603.78	2.04	0.00164	HCD (High Energy Collision Dissociation)	MS2	0	45	25.2382	12478	nR-GLU+Try_180322142308.raw	F18	2.02
	FALSE	High	VFYPGPGHTSDNIT		1	1	1	4EYL	1	1504.71	High	2.25
		Checked	Confidence	Identifying Node	PSM Ambiguity	Annotated Sequence	Modifications	# Protein Groups	# Proteins	Master Protein Accessions	Protein Accessions	# Missed Cleavages	Charge	DeltaScore	DeltaCn	Rank	Search Engine Rank	m/z [Da]	MH+ [Da]	Theo. MH+ [Da]	DeltaM [ppm]	Deltam/z [Da]	Activation Type	MS Order	Isolation Interference [%]	Ion Inject Time [ms]	RT [min]	First Scan	Spectrum File	File ID	XCorr
		FALSE	High	Sequest HT (A2)	Unambiguous	VFYPGPGHTSDNIT		1	1	4EYL	4EYL	1	2	1	0	1	1	752.858	1504.71	1504.71	1.56	0.00117	HCD (High Energy Collision Dissociation)	MS2	38.5224	14.494	22.1871	10454	nR-GLU+Try_180322142308.raw	F18	2.25
	FALSE	High	VASNGLIVRD		1	1	1	4EYL	1	1043.58	High	3.29
		Checked	Confidence	Identifying Node	PSM Ambiguity	Annotated Sequence	Modifications	# Protein Groups	# Proteins	Master Protein Accessions	Protein Accessions	# Missed Cleavages	Charge	DeltaScore	DeltaCn	Rank	Search Engine Rank	m/z [Da]	MH+ [Da]	Theo. MH+ [Da]	DeltaM [ppm]	Deltam/z [Da]	Activation Type	MS Order	Isolation Interference [%]	Ion Inject Time [ms]	RT [min]	First Scan	Spectrum File	File ID	XCorr
		FALSE	High	Sequest HT (A2)	Unambiguous	VASNGLIVRD		1	1	4EYL	4EYL	1	2	0.9878	0	1	1	522.297	1043.59	1043.58	1.77	0.00092	HCD (High Energy Collision Dissociation)	MS2	0	38.302	19.6746	8656	nR-GLU+Try_180322142308.raw	F18	3.29
	FALSE	High	TGDQRFGD		1	1	1	4EYL	2	895.39	High	2.32
		Checked	Confidence	Identifying Node	PSM Ambiguity	Annotated Sequence	Modifications	# Protein Groups	# Proteins	Master Protein Accessions	Protein Accessions	# Missed Cleavages	Charge	DeltaScore	DeltaCn	Rank	Search Engine Rank	m/z [Da]	MH+ [Da]	Theo. MH+ [Da]	DeltaM [ppm]	Deltam/z [Da]	Activation Type	MS Order	Isolation Interference [%]	Ion Inject Time [ms]	RT [min]	First Scan	Spectrum File	File ID	XCorr
		FALSE	High	Sequest HT (A2)	Unambiguous	TGDQRFGD		1	1	4EYL	4EYL	2	2	1	0	1	1	448.199	895.392	895.39	1.22	0.00055	HCD (High Energy Collision Dissociation)	MS2	57.5784	45	14.4063	5152	nR-GLU+Try_180322142308.raw	F18	2.32
	FALSE	High	TGDQRFG		1	1	1	4EYL	2	780.363	High	1.91
		Checked	Confidence	Identifying Node	PSM Ambiguity	Annotated Sequence	Modifications	# Protein Groups	# Proteins	Master Protein Accessions	Protein Accessions	# Missed Cleavages	Charge	DeltaScore	DeltaCn	Rank	Search Engine Rank	m/z [Da]	MH+ [Da]	Theo. MH+ [Da]	DeltaM [ppm]	Deltam/z [Da]	Activation Type	MS Order	Isolation Interference [%]	Ion Inject Time [ms]	RT [min]	First Scan	Spectrum File	File ID	XCorr
		FALSE	High	Sequest HT (A2)	Unambiguous	TGDQRFG		1	1	4EYL	4EYL	2	2	1	0	1	1	390.686	780.364	780.363	1.04	0.00041	HCD (High Energy Collision Dissociation)	MS2	41.1799	45	14.1302	4957	nR-GLU+Try_180322142308.raw	F18	1.91
	FALSE	High	TEHYAASARAFG		1	1	2	4EYL	2	1280.6	High	3.3
		Checked	Confidence	Identifying Node	PSM Ambiguity	Annotated Sequence	Modifications	# Protein Groups	# Proteins	Master Protein Accessions	Protein Accessions	# Missed Cleavages	Charge	DeltaScore	DeltaCn	Rank	Search Engine Rank	m/z [Da]	MH+ [Da]	Theo. MH+ [Da]	DeltaM [ppm]	Deltam/z [Da]	Activation Type	MS Order	Isolation Interference [%]	Ion Inject Time [ms]	RT [min]	First Scan	Spectrum File	File ID	XCorr
		FALSE	High	Sequest HT (A2)	Unambiguous	TEHYAASARAFG		1	1	4EYL	4EYL	2	3	1	0	1	1	427.539	1280.6	1280.6	1.49	0.00064	HCD (High Energy Collision Dissociation)	MS2	0	45	17.8018	7247	nR-GLU+Try_180322142308.raw	F18	3.3
		FALSE	High	Sequest HT (A2)	Unambiguous	TEHYAASARAFG		1	1	4EYL	4EYL	2	2	1	0	1	1	640.805	1280.6	1280.6	1.26	0.00081	HCD (High Energy Collision Dissociation)	MS2	18.1179	14.499	17.7929	7240	nR-GLU+Try_180322142308.raw	F18	2.35
	FALSE	High	TAWTDDQTAQILN		1	1	1	4EYL	2	1476.7	High	2.42
		Checked	Confidence	Identifying Node	PSM Ambiguity	Annotated Sequence	Modifications	# Protein Groups	# Proteins	Master Protein Accessions	Protein Accessions	# Missed Cleavages	Charge	DeltaScore	DeltaCn	Rank	Search Engine Rank	m/z [Da]	MH+ [Da]	Theo. MH+ [Da]	DeltaM [ppm]	Deltam/z [Da]	Activation Type	MS Order	Isolation Interference [%]	Ion Inject Time [ms]	RT [min]	First Scan	Spectrum File	File ID	XCorr
		FALSE	High	Sequest HT (A2)	Unambiguous	TAWTDDQTAQILN		1	1	4EYL	4EYL	2	2	1	0	1	1	738.85	1476.69	1476.7	-2.1	-0.00155	HCD (High Energy Collision Dissociation)	MS2	0	45	26.5366	13343	nR-GLU+Try_180322142308.raw	F18	2.42
	FALSE	High	TAWTDDQTAQIL		1	1	1	4EYL	2	1362.65	High	2.76
		Checked	Confidence	Identifying Node	PSM Ambiguity	Annotated Sequence	Modifications	# Protein Groups	# Proteins	Master Protein Accessions	Protein Accessions	# Missed Cleavages	Charge	DeltaScore	DeltaCn	Rank	Search Engine Rank	m/z [Da]	MH+ [Da]	Theo. MH+ [Da]	DeltaM [ppm]	Deltam/z [Da]	Activation Type	MS Order	Isolation Interference [%]	Ion Inject Time [ms]	RT [min]	First Scan	Spectrum File	File ID	XCorr
		FALSE	High	Sequest HT (A2)	Unambiguous	TAWTDDQTAQIL		1	1	4EYL	4EYL	2	2	1	0	1	1	681.831	1362.66	1362.65	1.45	0.00099	HCD (High Energy Collision Dissociation)	MS2	19.5378	32.856	28.0896	14421	nR-GLU+Try_180322142308.raw	F18	2.76
	FALSE	High	TAWTDDQTA		1	1	1	4EYL	2	1008.43	High	2.04
		Checked	Confidence	Identifying Node	PSM Ambiguity	Annotated Sequence	Modifications	# Protein Groups	# Proteins	Master Protein Accessions	Protein Accessions	# Missed Cleavages	Charge	DeltaScore	DeltaCn	Rank	Search Engine Rank	m/z [Da]	MH+ [Da]	Theo. MH+ [Da]	DeltaM [ppm]	Deltam/z [Da]	Activation Type	MS Order	Isolation Interference [%]	Ion Inject Time [ms]	RT [min]	First Scan	Spectrum File	File ID	XCorr
		FALSE	High	Sequest HT (A2)	Unambiguous	TAWTDDQTA		1	1	4EYL	4EYL	2	2	1	0	1	1	504.718	1008.43	1008.43	1.68	0.00085	HCD (High Energy Collision Dissociation)	MS2	24.3113	34.893	19.5284	8546	nR-GLU+Try_180322142308.raw	F18	2.04
	FALSE	High	TAQILNWIKQE		1	1	1	4EYL	1	1343.73	High	4.2
		Checked	Confidence	Identifying Node	PSM Ambiguity	Annotated Sequence	Modifications	# Protein Groups	# Proteins	Master Protein Accessions	Protein Accessions	# Missed Cleavages	Charge	DeltaScore	DeltaCn	Rank	Search Engine Rank	m/z [Da]	MH+ [Da]	Theo. MH+ [Da]	DeltaM [ppm]	Deltam/z [Da]	Activation Type	MS Order	Isolation Interference [%]	Ion Inject Time [ms]	RT [min]	First Scan	Spectrum File	File ID	XCorr
		FALSE	High	Sequest HT (A2)	Unambiguous	TAQILNWIKQE		1	1	4EYL	4EYL	1	2	1	0	1	1	672.371	1343.73	1343.73	1.88	0.00126	HCD (High Energy Collision Dissociation)	MS2	6.04205	30.617	28.1197	14448	nR-GLU+Try_180322142308.raw	F18	4.2
	FALSE	High	TAPNFGPLKVFYPGPGHTSD		1	1	1	4EYL	1	2102.03	High	4.37
		Checked	Confidence	Identifying Node	PSM Ambiguity	Annotated Sequence	Modifications	# Protein Groups	# Proteins	Master Protein Accessions	Protein Accessions	# Missed Cleavages	Charge	DeltaScore	DeltaCn	Rank	Search Engine Rank	m/z [Da]	MH+ [Da]	Theo. MH+ [Da]	DeltaM [ppm]	Deltam/z [Da]	Activation Type	MS Order	Isolation Interference [%]	Ion Inject Time [ms]	RT [min]	First Scan	Spectrum File	File ID	XCorr
		FALSE	High	Sequest HT (A2)	Unambiguous	TAPNFGPLKVFYPGPGHTSD		1	1	4EYL	4EYL	1	2	1	0	1	1	1051.52	2102.04	2102.03	1.89	0.00198	HCD (High Energy Collision Dissociation)	MS2	0	45	27.9755	14330	nR-GLU+Try_180322142308.raw	F18	4.37
	FALSE	High	TAPNFGPLK		1	1	1	4EYL	0	944.52	High	2.27
		Checked	Confidence	Identifying Node	PSM Ambiguity	Annotated Sequence	Modifications	# Protein Groups	# Proteins	Master Protein Accessions	Protein Accessions	# Missed Cleavages	Charge	DeltaScore	DeltaCn	Rank	Search Engine Rank	m/z [Da]	MH+ [Da]	Theo. MH+ [Da]	DeltaM [ppm]	Deltam/z [Da]	Activation Type	MS Order	Isolation Interference [%]	Ion Inject Time [ms]	RT [min]	First Scan	Spectrum File	File ID	XCorr
		FALSE	High	Sequest HT (A2)	Unambiguous	TAPNFGPLK		1	1	4EYL	4EYL	0	2	0.5595	0	1	1	472.764	944.522	944.52	1.82	0.00086	HCD (High Energy Collision Dissociation)	MS2	0	45	22.2847	10537	nR-GLU+Try_180322142308.raw	F18	2.27
	FALSE	High	SRAAITHTARMAD		1	1	1	4EYL	2	1400.71	High	2.58
		Checked	Confidence	Identifying Node	PSM Ambiguity	Annotated Sequence	Modifications	# Protein Groups	# Proteins	Master Protein Accessions	Protein Accessions	# Missed Cleavages	Charge	DeltaScore	DeltaCn	Rank	Search Engine Rank	m/z [Da]	MH+ [Da]	Theo. MH+ [Da]	DeltaM [ppm]	Deltam/z [Da]	Activation Type	MS Order	Isolation Interference [%]	Ion Inject Time [ms]	RT [min]	First Scan	Spectrum File	File ID	XCorr
		FALSE	High	Sequest HT (A2)	Unambiguous	SRAAITHTARMAD		1	1	4EYL	4EYL	2	3	1	0	1	1	467.574	1400.71	1400.71	1.22	0.00057	HCD (High Energy Collision Dissociation)	MS2	5.71294	45	13.8113	4787	nR-GLU+Try_180322142308.raw	F18	2.58
	FALSE	High	SRAAITHTARMA		1	1	1	4EYL	2	1285.68	High	2.66
		Checked	Confidence	Identifying Node	PSM Ambiguity	Annotated Sequence	Modifications	# Protein Groups	# Proteins	Master Protein Accessions	Protein Accessions	# Missed Cleavages	Charge	DeltaScore	DeltaCn	Rank	Search Engine Rank	m/z [Da]	MH+ [Da]	Theo. MH+ [Da]	DeltaM [ppm]	Deltam/z [Da]	Activation Type	MS Order	Isolation Interference [%]	Ion Inject Time [ms]	RT [min]	First Scan	Spectrum File	File ID	XCorr
		FALSE	High	Sequest HT (A2)	Unambiguous	SRAAITHTARMA		1	1	4EYL	4EYL	2	3	0.797	0	1	1	429.232	1285.68	1285.68	1.18	0.00051	HCD (High Energy Collision Dissociation)	MS2	15.999	21.89	13.7032	4713	nR-GLU+Try_180322142308.raw	F18	2.66
	FALSE	High	SRAAITHT		1	1	1	4EYL	1	856.464	High	1.91
		Checked	Confidence	Identifying Node	PSM Ambiguity	Annotated Sequence	Modifications	# Protein Groups	# Proteins	Master Protein Accessions	Protein Accessions	# Missed Cleavages	Charge	DeltaScore	DeltaCn	Rank	Search Engine Rank	m/z [Da]	MH+ [Da]	Theo. MH+ [Da]	DeltaM [ppm]	Deltam/z [Da]	Activation Type	MS Order	Isolation Interference [%]	Ion Inject Time [ms]	RT [min]	First Scan	Spectrum File	File ID	XCorr
		FALSE	High	Sequest HT (A2)	Unambiguous	SRAAITHT		1	1	4EYL	4EYL	1	2	1	0	1	1	428.736	856.465	856.464	1.36	0.00058	HCD (High Energy Collision Dissociation)	MS2	42.0377	39.752	11.1051	3245	nR-GLU+Try_180322142308.raw	F18	1.91
	FALSE	High	SNQLAPQE		1	1	1	4EYL	0	886.426	High	2.11
		Checked	Confidence	Identifying Node	PSM Ambiguity	Annotated Sequence	Modifications	# Protein Groups	# Proteins	Master Protein Accessions	Protein Accessions	# Missed Cleavages	Charge	DeltaScore	DeltaCn	Rank	Search Engine Rank	m/z [Da]	MH+ [Da]	Theo. MH+ [Da]	DeltaM [ppm]	Deltam/z [Da]	Activation Type	MS Order	Isolation Interference [%]	Ion Inject Time [ms]	RT [min]	First Scan	Spectrum File	File ID	XCorr
		FALSE	High	Sequest HT (A2)	Unambiguous	SNQLAPQE		1	1	4EYL	4EYL	0	2	1	0	1	1	443.718	886.428	886.426	2.15	0.00095	HCD (High Energy Collision Dissociation)	MS2	14.3736	34.862	16.4874	6448	nR-GLU+Try_180322142308.raw	F18	2.11
	FALSE	High	SNGLIVRDGGR		1	1	1	4EYL	2	1143.62	High	2.71
		Checked	Confidence	Identifying Node	PSM Ambiguity	Annotated Sequence	Modifications	# Protein Groups	# Proteins	Master Protein Accessions	Protein Accessions	# Missed Cleavages	Charge	DeltaScore	DeltaCn	Rank	Search Engine Rank	m/z [Da]	MH+ [Da]	Theo. MH+ [Da]	DeltaM [ppm]	Deltam/z [Da]	Activation Type	MS Order	Isolation Interference [%]	Ion Inject Time [ms]	RT [min]	First Scan	Spectrum File	File ID	XCorr
		FALSE	High	Sequest HT (A2)	Unambiguous	SNGLIVRDGGR		1	1	4EYL	4EYL	2	2	1	0	1	1	572.315	1143.62	1143.62	0.28	0.00016	HCD (High Energy Collision Dissociation)	MS2	7.64325	36.594	15.941	6229	nR-GLU+Try_180322142308.raw	F18	2.71
	FALSE	High	SNGLIVRD		1	1	5	4EYL	1	873.479	High	2.88
		Checked	Confidence	Identifying Node	PSM Ambiguity	Annotated Sequence	Modifications	# Protein Groups	# Proteins	Master Protein Accessions	Protein Accessions	# Missed Cleavages	Charge	DeltaScore	DeltaCn	Rank	Search Engine Rank	m/z [Da]	MH+ [Da]	Theo. MH+ [Da]	DeltaM [ppm]	Deltam/z [Da]	Activation Type	MS Order	Isolation Interference [%]	Ion Inject Time [ms]	RT [min]	First Scan	Spectrum File	File ID	XCorr
		FALSE	High	Sequest HT (A2)	Unambiguous	SNGLIVRD		1	1	4EYL	4EYL	1	2	1	0	1	1	437.244	873.48	873.479	1.48	0.00065	HCD (High Energy Collision Dissociation)	MS2	38.1334	34.784	18.3933	7669	nR-GLU+Try_180322142308.raw	F18	2.88
		FALSE	High	Sequest HT (A2)	Unambiguous	SNGLIVRD		1	1	4EYL	4EYL	1	2	1	0	1	1	437.244	873.48	873.479	1.55	0.00068	HCD (High Energy Collision Dissociation)	MS2	32.1838	45	28.3234	14607	nR-GLU+Try_180322142308.raw	F18	2.09
		FALSE	High	Sequest HT (A2)	Unambiguous	SNGLIVRD		1	1	4EYL	4EYL	1	2	1	0	1	1	437.244	873.48	873.479	1.48	0.00065	HCD (High Energy Collision Dissociation)	MS2	27.3546	29.488	19.5804	8589	nR-GLU+Try_180322142308.raw	F18	2.07
		FALSE	High	Sequest HT (A2)	Unambiguous	SNGLIVRD		1	1	4EYL	4EYL	1	2	1	0	1	1	437.244	873.48	873.479	1.34	0.00059	HCD (High Energy Collision Dissociation)	MS2	35.0433	45	29.3238	15229	nR-GLU+Try_180322142308.raw	F18	2.06
		FALSE	High	Sequest HT (A2)	Unambiguous	SNGLIVRD		1	1	4EYL	4EYL	1	2	1	0	1	1	437.243	873.48	873.479	0.85	0.00037	HCD (High Energy Collision Dissociation)	MS2	0	45	27.3123	13848	nR-GLU+Try_180322142308.raw	F18	1.96
	FALSE	High	SNGLIVR		1	1	1	4EYL	0	758.452	High	2.21
		Checked	Confidence	Identifying Node	PSM Ambiguity	Annotated Sequence	Modifications	# Protein Groups	# Proteins	Master Protein Accessions	Protein Accessions	# Missed Cleavages	Charge	DeltaScore	DeltaCn	Rank	Search Engine Rank	m/z [Da]	MH+ [Da]	Theo. MH+ [Da]	DeltaM [ppm]	Deltam/z [Da]	Activation Type	MS Order	Isolation Interference [%]	Ion Inject Time [ms]	RT [min]	First Scan	Spectrum File	File ID	XCorr
		FALSE	High	Sequest HT (A2)	Unambiguous	SNGLIVR		1	1	4EYL	4EYL	0	2	1	0	1	1	379.73	758.452	758.452	0.53	0.0002	HCD (High Energy Collision Dissociation)	MS2	0	45	17.9615	7382	nR-GLU+Try_180322142308.raw	F18	2.21
	FALSE	High	SMIVMSHSAPDSRAAITHTAR		1	1	1	4EYL	2	2239.11	High	3.88
		Checked	Confidence	Identifying Node	PSM Ambiguity	Annotated Sequence	Modifications	# Protein Groups	# Proteins	Master Protein Accessions	Protein Accessions	# Missed Cleavages	Charge	DeltaScore	DeltaCn	Rank	Search Engine Rank	m/z [Da]	MH+ [Da]	Theo. MH+ [Da]	DeltaM [ppm]	Deltam/z [Da]	Activation Type	MS Order	Isolation Interference [%]	Ion Inject Time [ms]	RT [min]	First Scan	Spectrum File	File ID	XCorr
		FALSE	High	Sequest HT (A2)	Unambiguous	SMIVMSHSAPDSRAAITHTAR		1	1	4EYL	4EYL	2	4	1	0	1	1	560.532	2239.11	2239.11	-0.74	-0.00042	HCD (High Energy Collision Dissociation)	MS2	14.6154	45	18.6596	7885	nR-GLU+Try_180322142308.raw	F18	3.88
	FALSE	High	SMIVMSHSAPDSR		1	1	1	4EYL	1	1417.66	High	4.13
		Checked	Confidence	Identifying Node	PSM Ambiguity	Annotated Sequence	Modifications	# Protein Groups	# Proteins	Master Protein Accessions	Protein Accessions	# Missed Cleavages	Charge	DeltaScore	DeltaCn	Rank	Search Engine Rank	m/z [Da]	MH+ [Da]	Theo. MH+ [Da]	DeltaM [ppm]	Deltam/z [Da]	Activation Type	MS Order	Isolation Interference [%]	Ion Inject Time [ms]	RT [min]	First Scan	Spectrum File	File ID	XCorr
		FALSE	High	Sequest HT (A2)	Unambiguous	SMIVMSHSAPDSR		1	1	4EYL	4EYL	1	2	1	0	1	1	709.333	1417.66	1417.66	1.24	0.00088	HCD (High Energy Collision Dissociation)	MS2	0	45	18.4755	7737	nR-GLU+Try_180322142308.raw	F18	4.13
	FALSE	High	SMIVMSHSAPD		1	1	1	4EYL	0	1174.52	High	2.9
		Checked	Confidence	Identifying Node	PSM Ambiguity	Annotated Sequence	Modifications	# Protein Groups	# Proteins	Master Protein Accessions	Protein Accessions	# Missed Cleavages	Charge	DeltaScore	DeltaCn	Rank	Search Engine Rank	m/z [Da]	MH+ [Da]	Theo. MH+ [Da]	DeltaM [ppm]	Deltam/z [Da]	Activation Type	MS Order	Isolation Interference [%]	Ion Inject Time [ms]	RT [min]	First Scan	Spectrum File	File ID	XCorr
		FALSE	High	Sequest HT (A2)	Unambiguous	SMIVMSHSAPD		1	1	4EYL	4EYL	0	2	1	0	1	1	587.767	1174.53	1174.52	2.82	0.00165	HCD (High Energy Collision Dissociation)	MS2	0	30.628	20.7836	9346	nR-GLU+Try_180322142308.raw	F18	2.9
	FALSE	High	SKAKSLGNLGD		1	1	1	4EYL	2	1089.59	High	3.39
		Checked	Confidence	Identifying Node	PSM Ambiguity	Annotated Sequence	Modifications	# Protein Groups	# Proteins	Master Protein Accessions	Protein Accessions	# Missed Cleavages	Charge	DeltaScore	DeltaCn	Rank	Search Engine Rank	m/z [Da]	MH+ [Da]	Theo. MH+ [Da]	DeltaM [ppm]	Deltam/z [Da]	Activation Type	MS Order	Isolation Interference [%]	Ion Inject Time [ms]	RT [min]	First Scan	Spectrum File	File ID	XCorr
		FALSE	High	Sequest HT (A2)	Unambiguous	SKAKSLGNLGD		1	1	4EYL	4EYL	2	2	1	0	1	1	545.3	1089.59	1089.59	1.82	0.00099	HCD (High Energy Collision Dissociation)	MS2	24.8199	5.201	15.8195	6119	nR-GLU+Try_180322142308.raw	F18	3.39
	FALSE	High	SKAKSLGNL		1	1	1	4EYL	2	917.541	High	3.02
		Checked	Confidence	Identifying Node	PSM Ambiguity	Annotated Sequence	Modifications	# Protein Groups	# Proteins	Master Protein Accessions	Protein Accessions	# Missed Cleavages	Charge	DeltaScore	DeltaCn	Rank	Search Engine Rank	m/z [Da]	MH+ [Da]	Theo. MH+ [Da]	DeltaM [ppm]	Deltam/z [Da]	Activation Type	MS Order	Isolation Interference [%]	Ion Inject Time [ms]	RT [min]	First Scan	Spectrum File	File ID	XCorr
		FALSE	High	Sequest HT (A2)	Unambiguous	SKAKSLGNL		1	1	4EYL	4EYL	2	2	1	0	1	1	459.275	917.542	917.541	1.03	0.00047	HCD (High Energy Collision Dissociation)	MS2	29.2864	45	15.9768	6262	nR-GLU+Try_180322142308.raw	F18	3.02
	FALSE	High	IAFGGCLIKD		1	1	1	4EYL	1	1036.55	High	2.45
		Checked	Confidence	Identifying Node	PSM Ambiguity	Annotated Sequence	Modifications	# Protein Groups	# Proteins	Master Protein Accessions	Protein Accessions	# Missed Cleavages	Charge	DeltaScore	DeltaCn	Rank	Search Engine Rank	m/z [Da]	MH+ [Da]	Theo. MH+ [Da]	DeltaM [ppm]	Deltam/z [Da]	Activation Type	MS Order	Isolation Interference [%]	Ion Inject Time [ms]	RT [min]	First Scan	Spectrum File	File ID	XCorr
		FALSE	High	Sequest HT (A2)	Unambiguous	IAFGGCLIKD		1	1	4EYL	4EYL	1	2	0.9755	0	1	1	518.778	1036.55	1036.55	-0.21	-0.00011	HCD (High Energy Collision Dissociation)	MS2	48.6158	27.064	27.5791	14040	nR-GLU+Try_180322142308.raw	F18	2.45
	FALSE	High	WVEPATAPNFGPLK		1	1	1	4EYL	1	1526.8	High	3.32
		Checked	Confidence	Identifying Node	PSM Ambiguity	Annotated Sequence	Modifications	# Protein Groups	# Proteins	Master Protein Accessions	Protein Accessions	# Missed Cleavages	Charge	DeltaScore	DeltaCn	Rank	Search Engine Rank	m/z [Da]	MH+ [Da]	Theo. MH+ [Da]	DeltaM [ppm]	Deltam/z [Da]	Activation Type	MS Order	Isolation Interference [%]	Ion Inject Time [ms]	RT [min]	First Scan	Spectrum File	File ID	XCorr
		FALSE	High	Sequest HT (A2)	Unambiguous	WVEPATAPNFGPLK		1	1	4EYL	4EYL	1	2	1	0	1	1	763.905	1526.8	1526.8	1.22	0.00093	HCD (High Energy Collision Dissociation)	MS2	21.9816	45	27.6458	14089	nR-GLU+Try_180322142308.raw	F18	3.32
	FALSE	High	KVFYPGPGHTSD		1	1	1	4EYL	1	1304.63	High	3.5
		Checked	Confidence	Identifying Node	PSM Ambiguity	Annotated Sequence	Modifications	# Protein Groups	# Proteins	Master Protein Accessions	Protein Accessions	# Missed Cleavages	Charge	DeltaScore	DeltaCn	Rank	Search Engine Rank	m/z [Da]	MH+ [Da]	Theo. MH+ [Da]	DeltaM [ppm]	Deltam/z [Da]	Activation Type	MS Order	Isolation Interference [%]	Ion Inject Time [ms]	RT [min]	First Scan	Spectrum File	File ID	XCorr
		FALSE	High	Sequest HT (A2)	Unambiguous	KVFYPGPGHTSD		1	1	4EYL	4EYL	1	2	1	0	1	1	652.816	1304.62	1304.63	-1.85	-0.00121	HCD (High Energy Collision Dissociation)	MS2	34.7085	17.051	17.6681	7150	nR-GLU+Try_180322142308.raw	F18	3.5
	FALSE	High	KMGGMDALHAAGIAT		1	1	1	4EYL	2	1443.71	High	3.89
		Checked	Confidence	Identifying Node	PSM Ambiguity	Annotated Sequence	Modifications	# Protein Groups	# Proteins	Master Protein Accessions	Protein Accessions	# Missed Cleavages	Charge	DeltaScore	DeltaCn	Rank	Search Engine Rank	m/z [Da]	MH+ [Da]	Theo. MH+ [Da]	DeltaM [ppm]	Deltam/z [Da]	Activation Type	MS Order	Isolation Interference [%]	Ion Inject Time [ms]	RT [min]	First Scan	Spectrum File	File ID	XCorr
		FALSE	High	Sequest HT (A2)	Unambiguous	KMGGMDALHAAGIAT		1	1	4EYL	4EYL	2	2	0.7532	0	1	1	722.359	1443.71	1443.71	1.79	0.00129	HCD (High Energy Collision Dissociation)	MS2	0	45	23.7286	11635	nR-GLU+Try_180322142308.raw	F18	3.89
	FALSE	High	ASMIVMSHSAPDSRAAITHTAR		1	1	1	4EYL	2	2310.14	High	4.6
		Checked	Confidence	Identifying Node	PSM Ambiguity	Annotated Sequence	Modifications	# Protein Groups	# Proteins	Master Protein Accessions	Protein Accessions	# Missed Cleavages	Charge	DeltaScore	DeltaCn	Rank	Search Engine Rank	m/z [Da]	MH+ [Da]	Theo. MH+ [Da]	DeltaM [ppm]	Deltam/z [Da]	Activation Type	MS Order	Isolation Interference [%]	Ion Inject Time [ms]	RT [min]	First Scan	Spectrum File	File ID	XCorr
		FALSE	High	Sequest HT (A2)	Unambiguous	ASMIVMSHSAPDSRAAITHTAR		1	1	4EYL	4EYL	2	4	1	0	1	1	578.291	2310.14	2310.14	-0.72	-0.00042	HCD (High Energy Collision Dissociation)	MS2	12.8061	18.395	18.9842	8124	nR-GLU+Try_180322142308.raw	F18	4.6
	FALSE	High	ASMIVMSHSAPDSRAAITHTA		1	1	1	4EYL	2	2154.04	High	6.51
		Checked	Confidence	Identifying Node	PSM Ambiguity	Annotated Sequence	Modifications	# Protein Groups	# Proteins	Master Protein Accessions	Protein Accessions	# Missed Cleavages	Charge	DeltaScore	DeltaCn	Rank	Search Engine Rank	m/z [Da]	MH+ [Da]	Theo. MH+ [Da]	DeltaM [ppm]	Deltam/z [Da]	Activation Type	MS Order	Isolation Interference [%]	Ion Inject Time [ms]	RT [min]	First Scan	Spectrum File	File ID	XCorr
		FALSE	High	Sequest HT (A2)	Unambiguous	ASMIVMSHSAPDSRAAITHTA		1	1	4EYL	4EYL	2	3	1	0	1	1	718.686	2154.04	2154.04	0.67	0.00048	HCD (High Energy Collision Dissociation)	MS2	0	17.582	20.4259	9118	nR-GLU+Try_180322142308.raw	F18	6.51
	FALSE	High	ASMIVMSHSAPDSRAAITH		1	1	1	4EYL	2	1981.96	High	4.47
		Checked	Confidence	Identifying Node	PSM Ambiguity	Annotated Sequence	Modifications	# Protein Groups	# Proteins	Master Protein Accessions	Protein Accessions	# Missed Cleavages	Charge	DeltaScore	DeltaCn	Rank	Search Engine Rank	m/z [Da]	MH+ [Da]	Theo. MH+ [Da]	DeltaM [ppm]	Deltam/z [Da]	Activation Type	MS Order	Isolation Interference [%]	Ion Inject Time [ms]	RT [min]	First Scan	Spectrum File	File ID	XCorr
		FALSE	High	Sequest HT (A2)	Unambiguous	ASMIVMSHSAPDSRAAITH		1	1	4EYL	4EYL	2	3	1	0	1	1	661.326	1981.96	1981.96	2.06	0.00136	HCD (High Energy Collision Dissociation)	MS2	73.2629	3.305	19.8649	8759	nR-GLU+Try_180322142308.raw	F18	4.47
	FALSE	High	ASMIVMSHSAPDSRAAIT		1	1	1	4EYL	2	1844.9	High	4.5
		Checked	Confidence	Identifying Node	PSM Ambiguity	Annotated Sequence	Modifications	# Protein Groups	# Proteins	Master Protein Accessions	Protein Accessions	# Missed Cleavages	Charge	DeltaScore	DeltaCn	Rank	Search Engine Rank	m/z [Da]	MH+ [Da]	Theo. MH+ [Da]	DeltaM [ppm]	Deltam/z [Da]	Activation Type	MS Order	Isolation Interference [%]	Ion Inject Time [ms]	RT [min]	First Scan	Spectrum File	File ID	XCorr
		FALSE	High	Sequest HT (A2)	Unambiguous	ASMIVMSHSAPDSRAAIT		1	1	4EYL	4EYL	2	2	1	0	1	1	922.954	1844.9	1844.9	0.87	0.0008	HCD (High Energy Collision Dissociation)	MS2	9.40029	31.917	21.6885	10047	nR-GLU+Try_180322142308.raw	F18	4.5
	FALSE	High	ASMIVMSHSAPDSRAA		1	1	1	4EYL	2	1630.77	High	3.73
		Checked	Confidence	Identifying Node	PSM Ambiguity	Annotated Sequence	Modifications	# Protein Groups	# Proteins	Master Protein Accessions	Protein Accessions	# Missed Cleavages	Charge	DeltaScore	DeltaCn	Rank	Search Engine Rank	m/z [Da]	MH+ [Da]	Theo. MH+ [Da]	DeltaM [ppm]	Deltam/z [Da]	Activation Type	MS Order	Isolation Interference [%]	Ion Inject Time [ms]	RT [min]	First Scan	Spectrum File	File ID	XCorr
		FALSE	High	Sequest HT (A2)	Unambiguous	ASMIVMSHSAPDSRAA		1	1	4EYL	4EYL	2	2	1	0	1	1	815.89	1630.77	1630.77	3.39	0.00277	HCD (High Energy Collision Dissociation)	MS2	0	45	19.4181	8457	nR-GLU+Try_180322142308.raw	F18	3.73
	FALSE	High	ASMIVMSHSAPDSR		1	1	3	4EYL	1	1488.69	High	4.36
		Checked	Confidence	Identifying Node	PSM Ambiguity	Annotated Sequence	Modifications	# Protein Groups	# Proteins	Master Protein Accessions	Protein Accessions	# Missed Cleavages	Charge	DeltaScore	DeltaCn	Rank	Search Engine Rank	m/z [Da]	MH+ [Da]	Theo. MH+ [Da]	DeltaM [ppm]	Deltam/z [Da]	Activation Type	MS Order	Isolation Interference [%]	Ion Inject Time [ms]	RT [min]	First Scan	Spectrum File	File ID	XCorr
		FALSE	High	Sequest HT (A2)	Unambiguous	ASMIVMSHSAPDSR		1	1	4EYL	4EYL	1	3	1	0	1	1	496.904	1488.7	1488.69	1.99	0.00099	HCD (High Energy Collision Dissociation)	MS2	48.2268	45	18.9362	8088	nR-GLU+Try_180322142308.raw	F18	4.36
		FALSE	High	Sequest HT (A2)	Unambiguous	ASMIVMSHSAPDSR		1	1	4EYL	4EYL	1	2	1	0	1	1	744.853	1488.7	1488.69	3.48	0.00259	HCD (High Energy Collision Dissociation)	MS2	57.9124	25.626	18.8846	8055	nR-GLU+Try_180322142308.raw	F18	3.18
		FALSE	High	Sequest HT (A2)	Unambiguous	ASMIVMSHSAPDSR		1	1	4EYL	4EYL	1	2	1	0	1	1	744.852	1488.7	1488.69	2.33	0.00173	HCD (High Energy Collision Dissociation)	MS2	62.6513	45	29.037	15076	nR-GLU+Try_180322142308.raw	F18	2.34
	FALSE	High	ASMIVMSHSAPDS		1	1	1	4EYL	1	1332.59	High	2.98
		Checked	Confidence	Identifying Node	PSM Ambiguity	Annotated Sequence	Modifications	# Protein Groups	# Proteins	Master Protein Accessions	Protein Accessions	# Missed Cleavages	Charge	DeltaScore	DeltaCn	Rank	Search Engine Rank	m/z [Da]	MH+ [Da]	Theo. MH+ [Da]	DeltaM [ppm]	Deltam/z [Da]	Activation Type	MS Order	Isolation Interference [%]	Ion Inject Time [ms]	RT [min]	First Scan	Spectrum File	File ID	XCorr
		FALSE	High	Sequest HT (A2)	Unambiguous	ASMIVMSHSAPDS		1	1	4EYL	4EYL	1	2	1	0	1	1	666.801	1332.59	1332.59	1.71	0.00114	HCD (High Energy Collision Dissociation)	MS2	41.6306	24.933	21.0928	9576	nR-GLU+Try_180322142308.raw	F18	2.98
	FALSE	High	ASMIVMSHSAPD		1	1	1	4EYL	0	1245.56	High	3.48
		Checked	Confidence	Identifying Node	PSM Ambiguity	Annotated Sequence	Modifications	# Protein Groups	# Proteins	Master Protein Accessions	Protein Accessions	# Missed Cleavages	Charge	DeltaScore	DeltaCn	Rank	Search Engine Rank	m/z [Da]	MH+ [Da]	Theo. MH+ [Da]	DeltaM [ppm]	Deltam/z [Da]	Activation Type	MS Order	Isolation Interference [%]	Ion Inject Time [ms]	RT [min]	First Scan	Spectrum File	File ID	XCorr
		FALSE	High	Sequest HT (A2)	Unambiguous	ASMIVMSHSAPD		1	1	4EYL	4EYL	0	2	1	0	1	1	623.285	1245.56	1245.56	1.38	0.00086	HCD (High Energy Collision Dissociation)	MS2	5.6254	25.705	21.3378	9776	nR-GLU+Try_180322142308.raw	F18	3.48
	FALSE	High	ASMIVMSHS		1	1	1	4EYL	0	962.443	High	2.48
		Checked	Confidence	Identifying Node	PSM Ambiguity	Annotated Sequence	Modifications	# Protein Groups	# Proteins	Master Protein Accessions	Protein Accessions	# Missed Cleavages	Charge	DeltaScore	DeltaCn	Rank	Search Engine Rank	m/z [Da]	MH+ [Da]	Theo. MH+ [Da]	DeltaM [ppm]	Deltam/z [Da]	Activation Type	MS Order	Isolation Interference [%]	Ion Inject Time [ms]	RT [min]	First Scan	Spectrum File	File ID	XCorr
		FALSE	High	Sequest HT (A2)	Unambiguous	ASMIVMSHS		1	1	4EYL	4EYL	0	2	1	0	1	1	481.726	962.445	962.443	1.34	0.00064	HCD (High Energy Collision Dissociation)	MS2	0	27.881	20.2917	9060	nR-GLU+Try_180322142308.raw	F18	2.48
	FALSE	High	ASARAFGAAFPK		1	1	2	4EYL	1	1193.64	High	2.56
		Checked	Confidence	Identifying Node	PSM Ambiguity	Annotated Sequence	Modifications	# Protein Groups	# Proteins	Master Protein Accessions	Protein Accessions	# Missed Cleavages	Charge	DeltaScore	DeltaCn	Rank	Search Engine Rank	m/z [Da]	MH+ [Da]	Theo. MH+ [Da]	DeltaM [ppm]	Deltam/z [Da]	Activation Type	MS Order	Isolation Interference [%]	Ion Inject Time [ms]	RT [min]	First Scan	Spectrum File	File ID	XCorr
		FALSE	High	Sequest HT (A2)	Unambiguous	ASARAFGAAFPK		1	1	4EYL	4EYL	1	3	1	0	1	1	398.553	1193.64	1193.64	1.75	0.0007	HCD (High Energy Collision Dissociation)	MS2	36.2701	45	20.943	9468	nR-GLU+Try_180322142308.raw	F18	2.56
		FALSE	High	Sequest HT (A2)	Unambiguous	ASARAFGAAFPK		1	1	4EYL	4EYL	1	2	1	0	1	1	597.325	1193.64	1193.64	0.46	0.00027	HCD (High Energy Collision Dissociation)	MS2	50.6463	21.425	20.9696	9484	nR-GLU+Try_180322142308.raw	F18	2.08
	FALSE	High	ARAFGAAFPK		1	1	1	4EYL	1	1035.57	High	2.38
		Checked	Confidence	Identifying Node	PSM Ambiguity	Annotated Sequence	Modifications	# Protein Groups	# Proteins	Master Protein Accessions	Protein Accessions	# Missed Cleavages	Charge	DeltaScore	DeltaCn	Rank	Search Engine Rank	m/z [Da]	MH+ [Da]	Theo. MH+ [Da]	DeltaM [ppm]	Deltam/z [Da]	Activation Type	MS Order	Isolation Interference [%]	Ion Inject Time [ms]	RT [min]	First Scan	Spectrum File	File ID	XCorr
		FALSE	High	Sequest HT (A2)	Unambiguous	ARAFGAAFPK		1	1	4EYL	4EYL	1	2	1	0	1	1	518.291	1035.57	1035.57	0.34	0.00018	HCD (High Energy Collision Dissociation)	MS2	6.96341	22.885	20.0668	8916	nR-GLU+Try_180322142308.raw	F18	2.38
	FALSE	High	ASNGLIVRD		1	1	2	4EYL	1	944.516	High	2.98
		Checked	Confidence	Identifying Node	PSM Ambiguity	Annotated Sequence	Modifications	# Protein Groups	# Proteins	Master Protein Accessions	Protein Accessions	# Missed Cleavages	Charge	DeltaScore	DeltaCn	Rank	Search Engine Rank	m/z [Da]	MH+ [Da]	Theo. MH+ [Da]	DeltaM [ppm]	Deltam/z [Da]	Activation Type	MS Order	Isolation Interference [%]	Ion Inject Time [ms]	RT [min]	First Scan	Spectrum File	File ID	XCorr
		FALSE	High	Sequest HT (A2)	Unambiguous	ASNGLIVRD		1	1	4EYL	4EYL	1	2	0.8859	0	1	1	472.762	944.517	944.516	1.11	0.00052	HCD (High Energy Collision Dissociation)	MS2	0	45	20.5888	9206	nR-GLU+Try_180322142308.raw	F18	2.98
		FALSE	High	Sequest HT (A2)	Unambiguous	ASNGLIVRD		1	1	4EYL	4EYL	1	2	0.7941	0	1	1	472.762	944.516	944.516	0.33	0.00016	HCD (High Energy Collision Dissociation)	MS2	0	45	18.645	7874	nR-GLU+Try_180322142308.raw	F18	2.72
	FALSE	High	APDSRAAITHTAR		1	1	1	4EYL	2	1366.72	High	4.23
		Checked	Confidence	Identifying Node	PSM Ambiguity	Annotated Sequence	Modifications	# Protein Groups	# Proteins	Master Protein Accessions	Protein Accessions	# Missed Cleavages	Charge	DeltaScore	DeltaCn	Rank	Search Engine Rank	m/z [Da]	MH+ [Da]	Theo. MH+ [Da]	DeltaM [ppm]	Deltam/z [Da]	Activation Type	MS Order	Isolation Interference [%]	Ion Inject Time [ms]	RT [min]	First Scan	Spectrum File	File ID	XCorr
		FALSE	High	Sequest HT (A2)	Unambiguous	APDSRAAITHTAR		1	1	4EYL	4EYL	2	3	1	0	1	1	456.245	1366.72	1366.72	2.09	0.00095	HCD (High Energy Collision Dissociation)	MS2	31.8233	3.883	13.3874	4521	nR-GLU+Try_180322142308.raw	F18	4.23
	FALSE	High	ANALSNQLAPQE		1	1	2	4EYL	0	1255.63	High	2.52
		Checked	Confidence	Identifying Node	PSM Ambiguity	Annotated Sequence	Modifications	# Protein Groups	# Proteins	Master Protein Accessions	Protein Accessions	# Missed Cleavages	Charge	DeltaScore	DeltaCn	Rank	Search Engine Rank	m/z [Da]	MH+ [Da]	Theo. MH+ [Da]	DeltaM [ppm]	Deltam/z [Da]	Activation Type	MS Order	Isolation Interference [%]	Ion Inject Time [ms]	RT [min]	First Scan	Spectrum File	File ID	XCorr
		FALSE	High	Sequest HT (A2)	Unambiguous	ANALSNQLAPQE		1	1	4EYL	4EYL	0	2	1	0	1	1	628.319	1255.63	1255.63	2.06	0.0013	HCD (High Energy Collision Dissociation)	MS2	36.2087	30.479	21.8042	10152	nR-GLU+Try_180322142308.raw	F18	2.52
		FALSE	High	Sequest HT (A2)	Unambiguous	ANALSNQLAPQE		1	1	4EYL	4EYL	0	2	1	0	1	1	628.319	1255.63	1255.63	2.06	0.0013	HCD (High Energy Collision Dissociation)	MS2	0	45	22.905	11037	nR-GLU+Try_180322142308.raw	F18	2.21
	FALSE	High	ALSNQLAPQE		1	1	1	4EYL	0	1070.55	High	1.91
		Checked	Confidence	Identifying Node	PSM Ambiguity	Annotated Sequence	Modifications	# Protein Groups	# Proteins	Master Protein Accessions	Protein Accessions	# Missed Cleavages	Charge	DeltaScore	DeltaCn	Rank	Search Engine Rank	m/z [Da]	MH+ [Da]	Theo. MH+ [Da]	DeltaM [ppm]	Deltam/z [Da]	Activation Type	MS Order	Isolation Interference [%]	Ion Inject Time [ms]	RT [min]	First Scan	Spectrum File	File ID	XCorr
		FALSE	High	Sequest HT (A2)	Unambiguous	ALSNQLAPQE		1	1	4EYL	4EYL	0	2	1	0	1	1	535.778	1070.55	1070.55	1.7	0.00091	HCD (High Energy Collision Dissociation)	MS2	41.0306	26.203	20.6444	9244	nR-GLU+Try_180322142308.raw	F18	1.91
	FALSE	High	ALHAAGIAT		1	1	1	4EYL	0	824.462	High	2.49
		Checked	Confidence	Identifying Node	PSM Ambiguity	Annotated Sequence	Modifications	# Protein Groups	# Proteins	Master Protein Accessions	Protein Accessions	# Missed Cleavages	Charge	DeltaScore	DeltaCn	Rank	Search Engine Rank	m/z [Da]	MH+ [Da]	Theo. MH+ [Da]	DeltaM [ppm]	Deltam/z [Da]	Activation Type	MS Order	Isolation Interference [%]	Ion Inject Time [ms]	RT [min]	First Scan	Spectrum File	File ID	XCorr
		FALSE	High	Sequest HT (A2)	Unambiguous	ALHAAGIAT		1	1	4EYL	4EYL	0	2	1	0	1	1	412.735	824.463	824.462	0.71	0.00029	HCD (High Energy Collision Dissociation)	MS2	14.3365	32.784	17.8941	7321	nR-GLU+Try_180322142308.raw	F18	2.49
	FALSE	High	AFGAAFPKASMIV		1	1	1	4EYL	1	1309.7	High	3.49
		Checked	Confidence	Identifying Node	PSM Ambiguity	Annotated Sequence	Modifications	# Protein Groups	# Proteins	Master Protein Accessions	Protein Accessions	# Missed Cleavages	Charge	DeltaScore	DeltaCn	Rank	Search Engine Rank	m/z [Da]	MH+ [Da]	Theo. MH+ [Da]	DeltaM [ppm]	Deltam/z [Da]	Activation Type	MS Order	Isolation Interference [%]	Ion Inject Time [ms]	RT [min]	First Scan	Spectrum File	File ID	XCorr
		FALSE	High	Sequest HT (A2)	Unambiguous	AFGAAFPKASMIV		1	1	4EYL	4EYL	1	2	1	0	1	1	655.356	1309.7	1309.7	5.13	0.00336	HCD (High Energy Collision Dissociation)	MS2	46.1285	45	28.2883	14581	nR-GLU+Try_180322142308.raw	F18	3.49
	FALSE	High	AFGAAFPKASM		1	1	1	4EYL	1	1097.54	High	2.23
		Checked	Confidence	Identifying Node	PSM Ambiguity	Annotated Sequence	Modifications	# Protein Groups	# Proteins	Master Protein Accessions	Protein Accessions	# Missed Cleavages	Charge	DeltaScore	DeltaCn	Rank	Search Engine Rank	m/z [Da]	MH+ [Da]	Theo. MH+ [Da]	DeltaM [ppm]	Deltam/z [Da]	Activation Type	MS Order	Isolation Interference [%]	Ion Inject Time [ms]	RT [min]	First Scan	Spectrum File	File ID	XCorr
		FALSE	High	Sequest HT (A2)	Unambiguous	AFGAAFPKASM		1	1	4EYL	4EYL	1	2	1	0	1	1	549.277	1097.55	1097.54	2.47	0.00135	HCD (High Energy Collision Dissociation)	MS2	0	45	25.6046	12710	nR-GLU+Try_180322142308.raw	F18	2.23
	FALSE	High	AFGAAFPKA		1	1	1	4EYL	1	879.472	High	1.9
		Checked	Confidence	Identifying Node	PSM Ambiguity	Annotated Sequence	Modifications	# Protein Groups	# Proteins	Master Protein Accessions	Protein Accessions	# Missed Cleavages	Charge	DeltaScore	DeltaCn	Rank	Search Engine Rank	m/z [Da]	MH+ [Da]	Theo. MH+ [Da]	DeltaM [ppm]	Deltam/z [Da]	Activation Type	MS Order	Isolation Interference [%]	Ion Inject Time [ms]	RT [min]	First Scan	Spectrum File	File ID	XCorr
		FALSE	High	Sequest HT (A2)	Unambiguous	AFGAAFPKA		1	1	4EYL	4EYL	1	2	1	0	1	1	440.241	879.475	879.472	2.66	0.00117	HCD (High Energy Collision Dissociation)	MS2	14.3359	45	23.474	11461	nR-GLU+Try_180322142308.raw	F18	1.9
	FALSE	High	AFGAAFPK		1	1	1	4EYL	0	808.435	High	2.15
		Checked	Confidence	Identifying Node	PSM Ambiguity	Annotated Sequence	Modifications	# Protein Groups	# Proteins	Master Protein Accessions	Protein Accessions	# Missed Cleavages	Charge	DeltaScore	DeltaCn	Rank	Search Engine Rank	m/z [Da]	MH+ [Da]	Theo. MH+ [Da]	DeltaM [ppm]	Deltam/z [Da]	Activation Type	MS Order	Isolation Interference [%]	Ion Inject Time [ms]	RT [min]	First Scan	Spectrum File	File ID	XCorr
		FALSE	High	Sequest HT (A2)	Unambiguous	AFGAAFPK		1	1	4EYL	4EYL	0	2	0.5302	0	1	1	404.722	808.437	808.435	1.92	0.00078	HCD (High Energy Collision Dissociation)	MS2	45.8205	45	22.2755	10529	nR-GLU+Try_180322142308.raw	F18	2.15
	FALSE	High	AANGWVEPATAPNFGPLK		1	1	1	4EYL	1	1839.94	High	3.72
		Checked	Confidence	Identifying Node	PSM Ambiguity	Annotated Sequence	Modifications	# Protein Groups	# Proteins	Master Protein Accessions	Protein Accessions	# Missed Cleavages	Charge	DeltaScore	DeltaCn	Rank	Search Engine Rank	m/z [Da]	MH+ [Da]	Theo. MH+ [Da]	DeltaM [ppm]	Deltam/z [Da]	Activation Type	MS Order	Isolation Interference [%]	Ion Inject Time [ms]	RT [min]	First Scan	Spectrum File	File ID	XCorr
		FALSE	High	Sequest HT (A2)	Unambiguous	AANGWVEPATAPNFGPLK		1	1	4EYL	4EYL	1	2	1	0	1	1	920.47	1839.93	1839.94	-3.27	-0.00301	HCD (High Energy Collision Dissociation)	MS2	0	45	27.8004	14211	nR-GLU+Try_180322142308.raw	F18	3.72
	FALSE	High	AAITHTARMADK		1	1	1	4EYL	2	1285.67	High	2.02
		Checked	Confidence	Identifying Node	PSM Ambiguity	Annotated Sequence	Modifications	# Protein Groups	# Proteins	Master Protein Accessions	Protein Accessions	# Missed Cleavages	Charge	DeltaScore	DeltaCn	Rank	Search Engine Rank	m/z [Da]	MH+ [Da]	Theo. MH+ [Da]	DeltaM [ppm]	Deltam/z [Da]	Activation Type	MS Order	Isolation Interference [%]	Ion Inject Time [ms]	RT [min]	First Scan	Spectrum File	File ID	XCorr
		FALSE	High	Sequest HT (A2)	Unambiguous	AAITHTARMADK		1	1	4EYL	4EYL	2	2	0.9059	0	1	1	643.339	1285.67	1285.67	2.47	0.00159	HCD (High Energy Collision Dissociation)	MS2	0	45	12.9836	4283	nR-GLU+Try_180322142308.raw	F18	2.02
	FALSE	High	AAITHTARMAD		1	1	1	4EYL	1	1157.57	High	2.1
		Checked	Confidence	Identifying Node	PSM Ambiguity	Annotated Sequence	Modifications	# Protein Groups	# Proteins	Master Protein Accessions	Protein Accessions	# Missed Cleavages	Charge	DeltaScore	DeltaCn	Rank	Search Engine Rank	m/z [Da]	MH+ [Da]	Theo. MH+ [Da]	DeltaM [ppm]	Deltam/z [Da]	Activation Type	MS Order	Isolation Interference [%]	Ion Inject Time [ms]	RT [min]	First Scan	Spectrum File	File ID	XCorr
		FALSE	High	Sequest HT (A2)	Unambiguous	AAITHTARMAD		1	1	4EYL	4EYL	1	2	1	0	1	1	579.293	1157.58	1157.57	4.43	0.00256	HCD (High Energy Collision Dissociation)	MS2	0	45	14.61	5292	nR-GLU+Try_180322142308.raw	F18	2.1
	FALSE	High	AAFPKASMIVMSHSAPDSR		1	1	3	4EYL	2	2002.98	High	6.34
		Checked	Confidence	Identifying Node	PSM Ambiguity	Annotated Sequence	Modifications	# Protein Groups	# Proteins	Master Protein Accessions	Protein Accessions	# Missed Cleavages	Charge	DeltaScore	DeltaCn	Rank	Search Engine Rank	m/z [Da]	MH+ [Da]	Theo. MH+ [Da]	DeltaM [ppm]	Deltam/z [Da]	Activation Type	MS Order	Isolation Interference [%]	Ion Inject Time [ms]	RT [min]	First Scan	Spectrum File	File ID	XCorr
		FALSE	High	Sequest HT (A2)	Unambiguous	AAFPKASMIVMSHSAPDSR		1	1	4EYL	4EYL	2	3	1	0	1	1	668.335	2002.99	2002.98	2.93	0.00196	HCD (High Energy Collision Dissociation)	MS2	33.3502	36.937	22.7003	10859	nR-GLU+Try_180322142308.raw	F18	6.34
		FALSE	High	Sequest HT (A2)	Unambiguous	AAFPKASMIVMSHSAPDSR		1	1	4EYL	4EYL	2	4	1	0	1	1	501.503	2002.99	2002.98	2.89	0.00145	HCD (High Energy Collision Dissociation)	MS2	7.2553	24.92	22.7494	10901	nR-GLU+Try_180322142308.raw	F18	6.24
		FALSE	High	Sequest HT (A2)	Unambiguous	AAFPKASMIVMSHSAPDSR		1	1	4EYL	4EYL	2	2	1	0	1	1	1002	2002.99	2002.98	4.43	0.00444	HCD (High Energy Collision Dissociation)	MS2	0	45	22.7257	10881	nR-GLU+Try_180322142308.raw	F18	5.81
	FALSE	High	ANGWVEPATAPNFGPLK		1	1	1	4EYL	1	1768.9	High	4.02
		Checked	Confidence	Identifying Node	PSM Ambiguity	Annotated Sequence	Modifications	# Protein Groups	# Proteins	Master Protein Accessions	Protein Accessions	# Missed Cleavages	Charge	DeltaScore	DeltaCn	Rank	Search Engine Rank	m/z [Da]	MH+ [Da]	Theo. MH+ [Da]	DeltaM [ppm]	Deltam/z [Da]	Activation Type	MS Order	Isolation Interference [%]	Ion Inject Time [ms]	RT [min]	First Scan	Spectrum File	File ID	XCorr
		FALSE	High	Sequest HT (A2)	Unambiguous	ANGWVEPATAPNFGPLK		1	1	4EYL	4EYL	1	2	1	0	1	1	884.96	1768.91	1768.9	5.91	0.00523	HCD (High Energy Collision Dissociation)	MS2	0	45	27.7529	14174	nR-GLU+Try_180322142308.raw	F18	4.02
	FALSE	High	AVASNGLIVR		1	1	1	4EYL	0	999.595	High	3.21
		Checked	Confidence	Identifying Node	PSM Ambiguity	Annotated Sequence	Modifications	# Protein Groups	# Proteins	Master Protein Accessions	Protein Accessions	# Missed Cleavages	Charge	DeltaScore	DeltaCn	Rank	Search Engine Rank	m/z [Da]	MH+ [Da]	Theo. MH+ [Da]	DeltaM [ppm]	Deltam/z [Da]	Activation Type	MS Order	Isolation Interference [%]	Ion Inject Time [ms]	RT [min]	First Scan	Spectrum File	File ID	XCorr
		FALSE	High	Sequest HT (A2)	Unambiguous	AVASNGLIVR		1	1	4EYL	4EYL	0	2	1	0	1	1	500.301	999.595	999.595	0.89	0.00045	HCD (High Energy Collision Dissociation)	MS2	0	21.639	20.0699	8918	nR-GLU+Try_180322142308.raw	F18	3.21
	FALSE	High	AVASNGLIVRD		1	1	10	4EYL	1	1114.62	High	3.35
		Checked	Confidence	Identifying Node	PSM Ambiguity	Annotated Sequence	Modifications	# Protein Groups	# Proteins	Master Protein Accessions	Protein Accessions	# Missed Cleavages	Charge	DeltaScore	DeltaCn	Rank	Search Engine Rank	m/z [Da]	MH+ [Da]	Theo. MH+ [Da]	DeltaM [ppm]	Deltam/z [Da]	Activation Type	MS Order	Isolation Interference [%]	Ion Inject Time [ms]	RT [min]	First Scan	Spectrum File	File ID	XCorr
		FALSE	High	Sequest HT (A2)	Unambiguous	AVASNGLIVRD		1	1	4EYL	4EYL	1	2	1	0	1	1	557.815	1114.62	1114.62	1.76	0.00098	HCD (High Energy Collision Dissociation)	MS2	5.10663	20.212	25.3487	12551	nR-GLU+Try_180322142308.raw	F18	3.35
		FALSE	High	Sequest HT (A2)	Unambiguous	AVASNGLIVRD		1	1	4EYL	4EYL	1	2	1	0	1	1	557.816	1114.62	1114.62	2.75	0.00153	HCD (High Energy Collision Dissociation)	MS2	0	0.854	20.2245	9017	nR-GLU+Try_180322142308.raw	F18	3.34
		FALSE	High	Sequest HT (A2)	Unambiguous	AVASNGLIVRD		1	1	4EYL	4EYL	1	2	1	0	1	1	557.815	1114.62	1114.62	1.65	0.00092	HCD (High Energy Collision Dissociation)	MS2	3.95057	3.057	21.2258	9683	nR-GLU+Try_180322142308.raw	F18	3.33
		FALSE	High	Sequest HT (A2)	Unambiguous	AVASNGLIVRD		1	1	4EYL	4EYL	1	2	1	0	1	1	557.816	1114.62	1114.62	2.31	0.00129	HCD (High Energy Collision Dissociation)	MS2	22.4471	16.567	24.3432	12003	nR-GLU+Try_180322142308.raw	F18	3.28
		FALSE	High	Sequest HT (A2)	Unambiguous	AVASNGLIVRD		1	1	4EYL	4EYL	1	2	1	0	1	1	557.815	1114.62	1114.62	1.65	0.00092	HCD (High Energy Collision Dissociation)	MS2	2.81121	26.106	29.7527	15433	nR-GLU+Try_180322142308.raw	F18	3.23
		FALSE	High	Sequest HT (A2)	Unambiguous	AVASNGLIVRD		1	1	4EYL	4EYL	1	2	1	0	1	1	557.815	1114.62	1114.62	1.65	0.00092	HCD (High Energy Collision Dissociation)	MS2	8.19851	11.234	22.2309	10492	nR-GLU+Try_180322142308.raw	F18	3.23
		FALSE	High	Sequest HT (A2)	Unambiguous	AVASNGLIVRD		1	1	4EYL	4EYL	1	2	1	0	1	1	557.815	1114.62	1114.62	1.43	0.0008	HCD (High Energy Collision Dissociation)	MS2	5.52989	15.756	28.75	14901	nR-GLU+Try_180322142308.raw	F18	3.19
		FALSE	High	Sequest HT (A2)	Unambiguous	AVASNGLIVRD		1	1	4EYL	4EYL	1	2	1	0	1	1	557.815	1114.62	1114.62	1.87	0.00104	HCD (High Energy Collision Dissociation)	MS2	6.57362	45	23.234	11287	nR-GLU+Try_180322142308.raw	F18	3.15
		FALSE	High	Sequest HT (A2)	Unambiguous	AVASNGLIVRD		1	1	4EYL	4EYL	1	2	1	0	1	1	557.816	1114.62	1114.62	2.53	0.00141	HCD (High Energy Collision Dissociation)	MS2	43.8424	11.434	27.7449	14168	nR-GLU+Try_180322142308.raw	F18	2.47
		FALSE	High	Sequest HT (A2)	Unambiguous	AVASNGLIVRD		1	1	4EYL	4EYL	1	2	1	0	1	1	557.815	1114.62	1114.62	1.65	0.00092	HCD (High Energy Collision Dissociation)	MS2	39.3706	20.892	26.5939	13379	nR-GLU+Try_180322142308.raw	F18	2.35
	FALSE	High	FGDLVFR		1	1	4	4EYL	1	853.457	High	2.64
		Checked	Confidence	Identifying Node	PSM Ambiguity	Annotated Sequence	Modifications	# Protein Groups	# Proteins	Master Protein Accessions	Protein Accessions	# Missed Cleavages	Charge	DeltaScore	DeltaCn	Rank	Search Engine Rank	m/z [Da]	MH+ [Da]	Theo. MH+ [Da]	DeltaM [ppm]	Deltam/z [Da]	Activation Type	MS Order	Isolation Interference [%]	Ion Inject Time [ms]	RT [min]	First Scan	Spectrum File	File ID	XCorr
		FALSE	High	Sequest HT (A2)	Unambiguous	FGDLVFR		1	1	4EYL	4EYL	1	2	1	0	1	1	427.233	853.458	853.457	1.63	0.0007	HCD (High Energy Collision Dissociation)	MS2	4.33769	45	27.807	14216	nR-GLU+Try_180322142308.raw	F18	2.64
		FALSE	High	Sequest HT (A2)	Unambiguous	FGDLVFR		1	1	4EYL	4EYL	1	2	1	0	1	1	427.234	853.46	853.457	4.2	0.00179	HCD (High Energy Collision Dissociation)	MS2	53.0773	44.589	26.7995	13502	nR-GLU+Try_180322142308.raw	F18	2.52
		FALSE	High	Sequest HT (A2)	Unambiguous	FGDLVFR		1	1	4EYL	4EYL	1	2	1	0	1	1	427.232	853.458	853.457	1.06	0.00045	HCD (High Energy Collision Dissociation)	MS2	3.78443	45	29.8241	15466	nR-GLU+Try_180322142308.raw	F18	2.35
		FALSE	High	Sequest HT (A2)	Unambiguous	FGDLVFR		1	1	4EYL	4EYL	1	2	1	0	1	1	427.232	853.457	853.457	0.7	0.0003	HCD (High Energy Collision Dissociation)	MS2	6.25946	45	28.809	14939	nR-GLU+Try_180322142308.raw	F18	2.21
	FALSE	High	KMGGMDALHAAG		1	1	1	4EYL	2	1158.54	High	2.12
		Checked	Confidence	Identifying Node	PSM Ambiguity	Annotated Sequence	Modifications	# Protein Groups	# Proteins	Master Protein Accessions	Protein Accessions	# Missed Cleavages	Charge	DeltaScore	DeltaCn	Rank	Search Engine Rank	m/z [Da]	MH+ [Da]	Theo. MH+ [Da]	DeltaM [ppm]	Deltam/z [Da]	Activation Type	MS Order	Isolation Interference [%]	Ion Inject Time [ms]	RT [min]	First Scan	Spectrum File	File ID	XCorr
		FALSE	High	Sequest HT (A2)	Unambiguous	KMGGMDALHAAG		1	1	4EYL	4EYL	2	2	1	0	1	1	579.774	1158.54	1158.54	1.94	0.00112	HCD (High Energy Collision Dissociation)	MS2	14.7844	37.819	18.9552	8102	nR-GLU+Try_180322142308.raw	F18	2.12
	FALSE	High	KMGGMDALHA		1	1	1	4EYL	2	1030.48	High	1.95
		Checked	Confidence	Identifying Node	PSM Ambiguity	Annotated Sequence	Modifications	# Protein Groups	# Proteins	Master Protein Accessions	Protein Accessions	# Missed Cleavages	Charge	DeltaScore	DeltaCn	Rank	Search Engine Rank	m/z [Da]	MH+ [Da]	Theo. MH+ [Da]	DeltaM [ppm]	Deltam/z [Da]	Activation Type	MS Order	Isolation Interference [%]	Ion Inject Time [ms]	RT [min]	First Scan	Spectrum File	File ID	XCorr
		FALSE	High	Sequest HT (A2)	Unambiguous	KMGGMDALHA		1	1	4EYL	4EYL	2	2	1	0	1	1	515.748	1030.49	1030.48	6.91	0.00356	HCD (High Energy Collision Dissociation)	MS2	36.0563	34.059	19.3045	8362	nR-GLU+Try_180322142308.raw	F18	1.95
	FALSE	High	KASMIVMSHSAPDSR		1	1	2	4EYL	2	1616.79	High	5.15
		Checked	Confidence	Identifying Node	PSM Ambiguity	Annotated Sequence	Modifications	# Protein Groups	# Proteins	Master Protein Accessions	Protein Accessions	# Missed Cleavages	Charge	DeltaScore	DeltaCn	Rank	Search Engine Rank	m/z [Da]	MH+ [Da]	Theo. MH+ [Da]	DeltaM [ppm]	Deltam/z [Da]	Activation Type	MS Order	Isolation Interference [%]	Ion Inject Time [ms]	RT [min]	First Scan	Spectrum File	File ID	XCorr
		FALSE	High	Sequest HT (A2)	Unambiguous	KASMIVMSHSAPDSR		1	1	4EYL	4EYL	2	2	1	0	1	1	808.899	1616.79	1616.79	2	0.00161	HCD (High Energy Collision Dissociation)	MS2	0	45	16.8236	6667	nR-GLU+Try_180322142308.raw	F18	5.15
		FALSE	High	Sequest HT (A2)	Unambiguous	KASMIVMSHSAPDSR		1	1	4EYL	4EYL	2	3	1	0	1	1	539.601	1616.79	1616.79	0.33	0.00018	HCD (High Energy Collision Dissociation)	MS2	6.55107	35.718	16.8314	6673	nR-GLU+Try_180322142308.raw	F18	4.99
	FALSE	High	KASMIVMSHSAPD		1	1	1	4EYL	1	1373.66	High	4.48
		Checked	Confidence	Identifying Node	PSM Ambiguity	Annotated Sequence	Modifications	# Protein Groups	# Proteins	Master Protein Accessions	Protein Accessions	# Missed Cleavages	Charge	DeltaScore	DeltaCn	Rank	Search Engine Rank	m/z [Da]	MH+ [Da]	Theo. MH+ [Da]	DeltaM [ppm]	Deltam/z [Da]	Activation Type	MS Order	Isolation Interference [%]	Ion Inject Time [ms]	RT [min]	First Scan	Spectrum File	File ID	XCorr
		FALSE	High	Sequest HT (A2)	Unambiguous	KASMIVMSHSAPD		1	1	4EYL	4EYL	1	2	1	0	1	1	687.333	1373.66	1373.66	2.94	0.00202	HCD (High Energy Collision Dissociation)	MS2	0	23.345	18.6771	7898	nR-GLU+Try_180322142308.raw	F18	4.48
	FALSE	High	HYAASARAFGAAFPKAS		1	1	1	4EYL	2	1722.87	High	2.53
		Checked	Confidence	Identifying Node	PSM Ambiguity	Annotated Sequence	Modifications	# Protein Groups	# Proteins	Master Protein Accessions	Protein Accessions	# Missed Cleavages	Charge	DeltaScore	DeltaCn	Rank	Search Engine Rank	m/z [Da]	MH+ [Da]	Theo. MH+ [Da]	DeltaM [ppm]	Deltam/z [Da]	Activation Type	MS Order	Isolation Interference [%]	Ion Inject Time [ms]	RT [min]	First Scan	Spectrum File	File ID	XCorr
		FALSE	High	Sequest HT (A2)	Unambiguous	HYAASARAFGAAFPKAS		1	1	4EYL	4EYL	2	3	1	0	1	1	574.963	1722.87	1722.87	1.67	0.00096	HCD (High Energy Collision Dissociation)	MS2	23.6933	16.276	21.3355	9775	nR-GLU+Try_180322142308.raw	F18	2.53
	FALSE	High	HYAASARAFGAAFPKA		1	1	2	4EYL	2	1635.84	High	3.03
		Checked	Confidence	Identifying Node	PSM Ambiguity	Annotated Sequence	Modifications	# Protein Groups	# Proteins	Master Protein Accessions	Protein Accessions	# Missed Cleavages	Charge	DeltaScore	DeltaCn	Rank	Search Engine Rank	m/z [Da]	MH+ [Da]	Theo. MH+ [Da]	DeltaM [ppm]	Deltam/z [Da]	Activation Type	MS Order	Isolation Interference [%]	Ion Inject Time [ms]	RT [min]	First Scan	Spectrum File	File ID	XCorr
		FALSE	High	Sequest HT (A2)	Unambiguous	HYAASARAFGAAFPKA		1	1	4EYL	4EYL	2	3	1	0	1	1	545.952	1635.84	1635.84	1.41	0.00077	HCD (High Energy Collision Dissociation)	MS2	24.2908	35.788	21.7264	10082	nR-GLU+Try_180322142308.raw	F18	3.03
		FALSE	High	Sequest HT (A2)	Unambiguous	HYAASARAFGAAFPKA		1	1	4EYL	4EYL	2	2	1	0	1	1	818.424	1635.84	1635.84	1.42	0.00116	HCD (High Energy Collision Dissociation)	MS2	0	45	21.7454	10100	nR-GLU+Try_180322142308.raw	F18	2.93
	FALSE	High	HYAASARAFGAAFPK		1	1	2	4EYL	1	1564.8	High	3.53
		Checked	Confidence	Identifying Node	PSM Ambiguity	Annotated Sequence	Modifications	# Protein Groups	# Proteins	Master Protein Accessions	Protein Accessions	# Missed Cleavages	Charge	DeltaScore	DeltaCn	Rank	Search Engine Rank	m/z [Da]	MH+ [Da]	Theo. MH+ [Da]	DeltaM [ppm]	Deltam/z [Da]	Activation Type	MS Order	Isolation Interference [%]	Ion Inject Time [ms]	RT [min]	First Scan	Spectrum File	File ID	XCorr
		FALSE	High	Sequest HT (A2)	Unambiguous	HYAASARAFGAAFPK		1	1	4EYL	4EYL	1	3	1	0	1	1	522.273	1564.8	1564.8	1.63	0.00085	HCD (High Energy Collision Dissociation)	MS2	30.3739	3.271	21.1241	9602	nR-GLU+Try_180322142308.raw	F18	3.53
		FALSE	High	Sequest HT (A2)	Unambiguous	HYAASARAFGAAFPK		1	1	4EYL	4EYL	1	2	1	0	1	1	782.907	1564.81	1564.8	3.05	0.00238	HCD (High Energy Collision Dissociation)	MS2	0	45	21.0505	9544	nR-GLU+Try_180322142308.raw	F18	3.03
	FALSE	High	HYAASARAFGAAFP		1	1	2	4EYL	1	1436.71	High	2.91
		Checked	Confidence	Identifying Node	PSM Ambiguity	Annotated Sequence	Modifications	# Protein Groups	# Proteins	Master Protein Accessions	Protein Accessions	# Missed Cleavages	Charge	DeltaScore	DeltaCn	Rank	Search Engine Rank	m/z [Da]	MH+ [Da]	Theo. MH+ [Da]	DeltaM [ppm]	Deltam/z [Da]	Activation Type	MS Order	Isolation Interference [%]	Ion Inject Time [ms]	RT [min]	First Scan	Spectrum File	File ID	XCorr
		FALSE	High	Sequest HT (A2)	Unambiguous	HYAASARAFGAAFP		1	1	4EYL	4EYL	1	2	1	0	1	1	718.859	1436.71	1436.71	1.95	0.0014	HCD (High Energy Collision Dissociation)	MS2	62.1955	45	24.6235	12114	nR-GLU+Try_180322142308.raw	F18	2.91
		FALSE	High	Sequest HT (A2)	Unambiguous	HYAASARAFGAAFP		1	1	4EYL	4EYL	1	3	1	0	1	1	479.575	1436.71	1436.71	1.82	0.00087	HCD (High Energy Collision Dissociation)	MS2	41.4172	45	24.8754	12257	nR-GLU+Try_180322142308.raw	F18	2.77
	FALSE	High	HYAASARAFGAA		1	1	1	4EYL	1	1192.59	High	2.19
		Checked	Confidence	Identifying Node	PSM Ambiguity	Annotated Sequence	Modifications	# Protein Groups	# Proteins	Master Protein Accessions	Protein Accessions	# Missed Cleavages	Charge	DeltaScore	DeltaCn	Rank	Search Engine Rank	m/z [Da]	MH+ [Da]	Theo. MH+ [Da]	DeltaM [ppm]	Deltam/z [Da]	Activation Type	MS Order	Isolation Interference [%]	Ion Inject Time [ms]	RT [min]	First Scan	Spectrum File	File ID	XCorr
		FALSE	High	Sequest HT (A2)	Unambiguous	HYAASARAFGAA		1	1	4EYL	4EYL	1	2	1	0	1	1	596.798	1192.59	1192.59	1.81	0.00108	HCD (High Energy Collision Dissociation)	MS2	0	45	17.4813	7028	nR-GLU+Try_180322142308.raw	F18	2.19
	FALSE	High	HYAASARAFGA		1	1	1	4EYL	1	1121.55	High	2.18
		Checked	Confidence	Identifying Node	PSM Ambiguity	Annotated Sequence	Modifications	# Protein Groups	# Proteins	Master Protein Accessions	Protein Accessions	# Missed Cleavages	Charge	DeltaScore	DeltaCn	Rank	Search Engine Rank	m/z [Da]	MH+ [Da]	Theo. MH+ [Da]	DeltaM [ppm]	Deltam/z [Da]	Activation Type	MS Order	Isolation Interference [%]	Ion Inject Time [ms]	RT [min]	First Scan	Spectrum File	File ID	XCorr
		FALSE	High	Sequest HT (A2)	Unambiguous	HYAASARAFGA		1	1	4EYL	4EYL	1	2	1	0	1	1	561.279	1121.55	1121.55	1.27	0.00071	HCD (High Energy Collision Dissociation)	MS2	0	45	17.537	7063	nR-GLU+Try_180322142308.raw	F18	2.18
	FALSE	High	HYAASARAFG		1	1	14	4EYL	1	1050.51	High	2.59
		Checked	Confidence	Identifying Node	PSM Ambiguity	Annotated Sequence	Modifications	# Protein Groups	# Proteins	Master Protein Accessions	Protein Accessions	# Missed Cleavages	Charge	DeltaScore	DeltaCn	Rank	Search Engine Rank	m/z [Da]	MH+ [Da]	Theo. MH+ [Da]	DeltaM [ppm]	Deltam/z [Da]	Activation Type	MS Order	Isolation Interference [%]	Ion Inject Time [ms]	RT [min]	First Scan	Spectrum File	File ID	XCorr
		FALSE	High	Sequest HT (A2)	Unambiguous	HYAASARAFG		1	1	4EYL	4EYL	1	2	1	0	1	1	525.76	1050.51	1050.51	0.2	0.00011	HCD (High Energy Collision Dissociation)	MS2	0	45	24.3803	12017	nR-GLU+Try_180322142308.raw	F18	2.59
		FALSE	High	Sequest HT (A2)	Unambiguous	HYAASARAFG		1	1	4EYL	4EYL	1	2	1	0	1	1	525.761	1050.51	1050.51	2.18	0.00114	HCD (High Energy Collision Dissociation)	MS2	0	8.144	16.9841	6810	nR-GLU+Try_180322142308.raw	F18	2.54
		FALSE	High	Sequest HT (A2)	Unambiguous	HYAASARAFG		1	1	4EYL	4EYL	1	2	1	0	1	1	525.76	1050.51	1050.51	0.78	0.00041	HCD (High Energy Collision Dissociation)	MS2	22.8453	21.656	21.0905	9575	nR-GLU+Try_180322142308.raw	F18	2.42
		FALSE	High	Sequest HT (A2)	Unambiguous	HYAASARAFG		1	1	4EYL	4EYL	1	2	1	0	1	1	525.76	1050.51	1050.51	1.02	0.00053	HCD (High Energy Collision Dissociation)	MS2	47.2316	16.898	18.5374	7791	nR-GLU+Try_180322142308.raw	F18	2.38
		FALSE	High	Sequest HT (A2)	Unambiguous	HYAASARAFG		1	1	4EYL	4EYL	1	2	1	0	1	1	525.76	1050.51	1050.51	0.78	0.00041	HCD (High Energy Collision Dissociation)	MS2	0	24.673	19.6903	8664	nR-GLU+Try_180322142308.raw	F18	2.36
		FALSE	High	Sequest HT (A2)	Unambiguous	HYAASARAFG		1	1	4EYL	4EYL	1	2	1	0	1	1	525.76	1050.51	1050.51	1.25	0.00066	HCD (High Energy Collision Dissociation)	MS2	18.1341	16.461	18.9591	8104	nR-GLU+Try_180322142308.raw	F18	2.33
		FALSE	High	Sequest HT (A2)	Unambiguous	HYAASARAFG		1	1	4EYL	4EYL	1	2	1	0	1	1	525.76	1050.51	1050.51	1.25	0.00066	HCD (High Energy Collision Dissociation)	MS2	37.406	32.206	27.2698	13828	nR-GLU+Try_180322142308.raw	F18	2.25
		FALSE	High	Sequest HT (A2)	Unambiguous	HYAASARAFG		1	1	4EYL	4EYL	1	2	1	0	1	1	525.76	1050.51	1050.51	1.71	0.0009	HCD (High Energy Collision Dissociation)	MS2	8.49045	1.432	15.9715	6257	nR-GLU+Try_180322142308.raw	F18	2.24
		FALSE	High	Sequest HT (A2)	Unambiguous	HYAASARAFG		1	1	4EYL	4EYL	1	2	1	0	1	1	525.76	1050.51	1050.51	1.36	0.00072	HCD (High Energy Collision Dissociation)	MS2	34.0117	26.827	22.1047	10386	nR-GLU+Try_180322142308.raw	F18	2.24
		FALSE	High	Sequest HT (A2)	Unambiguous	HYAASARAFG		1	1	4EYL	4EYL	1	2	1	0	1	1	525.761	1050.51	1050.51	3.11	0.00163	HCD (High Energy Collision Dissociation)	MS2	49.861	23.333	27.4633	13958	nR-GLU+Try_180322142308.raw	F18	2.21
		FALSE	High	Sequest HT (A2)	Unambiguous	HYAASARAFG		1	1	4EYL	4EYL	1	2	1	0	1	1	525.76	1050.51	1050.51	1.25	0.00066	HCD (High Energy Collision Dissociation)	MS2	32.3	26.186	23.3591	11372	nR-GLU+Try_180322142308.raw	F18	2.07
		FALSE	High	Sequest HT (A2)	Unambiguous	HYAASARAFG		1	1	4EYL	4EYL	1	2	1	0	1	1	525.761	1050.51	1050.51	2.41	0.00127	HCD (High Energy Collision Dissociation)	MS2	40.8027	42.47	26.3939	13252	nR-GLU+Try_180322142308.raw	F18	2.06
		FALSE	High	Sequest HT (A2)	Unambiguous	HYAASARAFG		1	1	4EYL	4EYL	1	2	1	0	1	1	525.76	1050.51	1050.51	1.13	0.00059	HCD (High Energy Collision Dissociation)	MS2	29.8373	36.023	25.3913	12583	nR-GLU+Try_180322142308.raw	F18	1.92
		FALSE	High	Sequest HT (A2)	Unambiguous	HYAASARAFG		1	1	4EYL	4EYL	1	2	1	0	1	1	525.76	1050.51	1050.51	1.83	0.00096	HCD (High Energy Collision Dissociation)	MS2	33.9996	45	29.4703	15304	nR-GLU+Try_180322142308.raw	F18	1.91
	FALSE	High	HYAASARAF		1	1	1	4EYL	1	993.49	High	2.29
		Checked	Confidence	Identifying Node	PSM Ambiguity	Annotated Sequence	Modifications	# Protein Groups	# Proteins	Master Protein Accessions	Protein Accessions	# Missed Cleavages	Charge	DeltaScore	DeltaCn	Rank	Search Engine Rank	m/z [Da]	MH+ [Da]	Theo. MH+ [Da]	DeltaM [ppm]	Deltam/z [Da]	Activation Type	MS Order	Isolation Interference [%]	Ion Inject Time [ms]	RT [min]	First Scan	Spectrum File	File ID	XCorr
		FALSE	High	Sequest HT (A2)	Unambiguous	HYAASARAF		1	1	4EYL	4EYL	1	2	1	0	1	1	497.25	993.492	993.49	1.73	0.00086	HCD (High Energy Collision Dissociation)	MS2	0	32.154	16.0015	6281	nR-GLU+Try_180322142308.raw	F18	2.29
	FALSE	High	HSAPDSRAAITHTAR		1	1	1	4EYL	2	1590.81	High	5.02
		Checked	Confidence	Identifying Node	PSM Ambiguity	Annotated Sequence	Modifications	# Protein Groups	# Proteins	Master Protein Accessions	Protein Accessions	# Missed Cleavages	Charge	DeltaScore	DeltaCn	Rank	Search Engine Rank	m/z [Da]	MH+ [Da]	Theo. MH+ [Da]	DeltaM [ppm]	Deltam/z [Da]	Activation Type	MS Order	Isolation Interference [%]	Ion Inject Time [ms]	RT [min]	First Scan	Spectrum File	File ID	XCorr
		FALSE	High	Sequest HT (A2)	Unambiguous	HSAPDSRAAITHTAR		1	1	4EYL	4EYL	2	4	1	0	1	1	398.459	1590.81	1590.81	3.11	0.00124	HCD (High Energy Collision Dissociation)	MS2	0	45	12.689	4113	nR-GLU+Try_180322142308.raw	F18	5.02
	FALSE	High	GPGHTSDNITVGID		1	1	1	4EYL	1	1382.65	High	2.05
		Checked	Confidence	Identifying Node	PSM Ambiguity	Annotated Sequence	Modifications	# Protein Groups	# Proteins	Master Protein Accessions	Protein Accessions	# Missed Cleavages	Charge	DeltaScore	DeltaCn	Rank	Search Engine Rank	m/z [Da]	MH+ [Da]	Theo. MH+ [Da]	DeltaM [ppm]	Deltam/z [Da]	Activation Type	MS Order	Isolation Interference [%]	Ion Inject Time [ms]	RT [min]	First Scan	Spectrum File	File ID	XCorr
		FALSE	High	Sequest HT (A2)	Unambiguous	GPGHTSDNITVGID		1	1	4EYL	4EYL	1	2	1	0	1	1	691.833	1382.66	1382.65	2.52	0.00174	HCD (High Energy Collision Dissociation)	MS2	0	37.409	21.7424	10097	nR-GLU+Try_180322142308.raw	F18	2.05
	FALSE	High	GMVAAQHSLTFAAN		1	1	1	4EYL	0	1417.69	High	3.9
		Checked	Confidence	Identifying Node	PSM Ambiguity	Annotated Sequence	Modifications	# Protein Groups	# Proteins	Master Protein Accessions	Protein Accessions	# Missed Cleavages	Charge	DeltaScore	DeltaCn	Rank	Search Engine Rank	m/z [Da]	MH+ [Da]	Theo. MH+ [Da]	DeltaM [ppm]	Deltam/z [Da]	Activation Type	MS Order	Isolation Interference [%]	Ion Inject Time [ms]	RT [min]	First Scan	Spectrum File	File ID	XCorr
		FALSE	High	Sequest HT (A2)	Unambiguous	GMVAAQHSLTFAAN		1	1	4EYL	4EYL	0	2	1	0	1	1	709.349	1417.69	1417.69	0.95	0.00067	HCD (High Energy Collision Dissociation)	MS2	0	41.32	23.4028	11406	nR-GLU+Try_180322142308.raw	F18	3.9
	FALSE	High	GMVAAQHSLTFAA		1	1	1	4EYL	0	1303.65	High	2.57
		Checked	Confidence	Identifying Node	PSM Ambiguity	Annotated Sequence	Modifications	# Protein Groups	# Proteins	Master Protein Accessions	Protein Accessions	# Missed Cleavages	Charge	DeltaScore	DeltaCn	Rank	Search Engine Rank	m/z [Da]	MH+ [Da]	Theo. MH+ [Da]	DeltaM [ppm]	Deltam/z [Da]	Activation Type	MS Order	Isolation Interference [%]	Ion Inject Time [ms]	RT [min]	First Scan	Spectrum File	File ID	XCorr
		FALSE	High	Sequest HT (A2)	Unambiguous	GMVAAQHSLTFAA		1	1	4EYL	4EYL	0	2	1	0	1	1	652.327	1303.65	1303.65	1	0.00065	HCD (High Energy Collision Dissociation)	MS2	0	35.806	24.9627	12307	nR-GLU+Try_180322142308.raw	F18	2.57
	FALSE	High	GMVAAQHSLTFA		1	1	8	4EYL	0	1232.61	High	3.76
		Checked	Confidence	Identifying Node	PSM Ambiguity	Annotated Sequence	Modifications	# Protein Groups	# Proteins	Master Protein Accessions	Protein Accessions	# Missed Cleavages	Charge	DeltaScore	DeltaCn	Rank	Search Engine Rank	m/z [Da]	MH+ [Da]	Theo. MH+ [Da]	DeltaM [ppm]	Deltam/z [Da]	Activation Type	MS Order	Isolation Interference [%]	Ion Inject Time [ms]	RT [min]	First Scan	Spectrum File	File ID	XCorr
		FALSE	High	Sequest HT (A2)	Unambiguous	GMVAAQHSLTFA		1	1	4EYL	4EYL	0	2	1	0	1	1	616.81	1232.61	1232.61	2.64	0.00163	HCD (High Energy Collision Dissociation)	MS2	0.426384	0.801	25.0928	12382	nR-GLU+Try_180322142308.raw	F18	3.76
		FALSE	High	Sequest HT (A2)	Unambiguous	GMVAAQHSLTFA		1	1	4EYL	4EYL	0	2	1	0	1	1	616.81	1232.61	1232.61	2.34	0.00144	HCD (High Energy Collision Dissociation)	MS2	3.27185	7.665	28.1165	14446	nR-GLU+Try_180322142308.raw	F18	3.66
		FALSE	High	Sequest HT (A2)	Unambiguous	GMVAAQHSLTFA		1	1	4EYL	4EYL	0	2	1	0	1	1	616.81	1232.61	1232.61	2.34	0.00144	HCD (High Energy Collision Dissociation)	MS2	2.35511	4.697	27.1008	13708	nR-GLU+Try_180322142308.raw	F18	3.59
		FALSE	High	Sequest HT (A2)	Unambiguous	GMVAAQHSLTFA		1	1	4EYL	4EYL	0	2	1	0	1	1	616.81	1232.61	1232.61	2.15	0.00132	HCD (High Energy Collision Dissociation)	MS2	7.19582	4.489	26.0988	13040	nR-GLU+Try_180322142308.raw	F18	3.29
		FALSE	High	Sequest HT (A2)	Unambiguous	GMVAAQHSLTFA		1	1	4EYL	4EYL	0	2	1	0	1	1	616.809	1232.61	1232.61	1.65	0.00102	HCD (High Energy Collision Dissociation)	MS2	3.48254	10.027	29.1186	15123	nR-GLU+Try_180322142308.raw	F18	3.15
		FALSE	High	Sequest HT (A2)	Unambiguous	GMVAAQHSLTFA		1	1	4EYL	4EYL	0	2	1	0	1	1	616.81	1232.61	1232.61	2.05	0.00126	HCD (High Energy Collision Dissociation)	MS2	69.7951	6.336	24.0878	11879	nR-GLU+Try_180322142308.raw	F18	3.06
		FALSE	High	Sequest HT (A2)	Unambiguous	GMVAAQHSLTFA		1	1	4EYL	4EYL	0	2	1	0	1	1	616.809	1232.61	1232.61	1.75	0.00108	HCD (High Energy Collision Dissociation)	MS2	1.04254	8.418	28.5424	14760	nR-GLU+Try_180322142308.raw	F18	3.01
		FALSE	High	Sequest HT (A2)	Unambiguous	GMVAAQHSLTFA		1	1	4EYL	4EYL	0	2	1	0	1	1	616.81	1232.61	1232.61	2.84	0.00175	HCD (High Energy Collision Dissociation)	MS2	14.2422	45	24.4305	12035	nR-GLU+Try_180322142308.raw	F18	2.12
	FALSE	High	GMVAAQHSLT		1	1	8	4EYL	0	1014.5	High	3.03
		Checked	Confidence	Identifying Node	PSM Ambiguity	Annotated Sequence	Modifications	# Protein Groups	# Proteins	Master Protein Accessions	Protein Accessions	# Missed Cleavages	Charge	DeltaScore	DeltaCn	Rank	Search Engine Rank	m/z [Da]	MH+ [Da]	Theo. MH+ [Da]	DeltaM [ppm]	Deltam/z [Da]	Activation Type	MS Order	Isolation Interference [%]	Ion Inject Time [ms]	RT [min]	First Scan	Spectrum File	File ID	XCorr
		FALSE	High	Sequest HT (A2)	Unambiguous	GMVAAQHSLT		1	1	4EYL	4EYL	0	2	1	0	1	1	507.756	1014.5	1014.5	1.1	0.00056	HCD (High Energy Collision Dissociation)	MS2	8.41033	13.654	18.9655	8109	nR-GLU+Try_180322142308.raw	F18	3.03
		FALSE	High	Sequest HT (A2)	Unambiguous	GMVAAQHSLT		1	1	4EYL	4EYL	0	2	1	0	1	1	507.757	1014.51	1014.5	2.36	0.0012	HCD (High Energy Collision Dissociation)	MS2	24.057	35.254	19.9727	8839	nR-GLU+Try_180322142308.raw	F18	2.91
		FALSE	High	Sequest HT (A2)	Unambiguous	GMVAAQHSLT		1	1	4EYL	4EYL	0	2	1	0	1	1	507.756	1014.51	1014.5	1.82	0.00092	HCD (High Energy Collision Dissociation)	MS2	68.9139	20.558	17.9269	7350	nR-GLU+Try_180322142308.raw	F18	2.8
		FALSE	High	Sequest HT (A2)	Unambiguous	GMVAAQHSLT		1	1	4EYL	4EYL	0	2	1	0	1	1	507.757	1014.51	1014.5	2.06	0.00105	HCD (High Energy Collision Dissociation)	MS2	27.8959	44.094	20.9797	9491	nR-GLU+Try_180322142308.raw	F18	2.57
		FALSE	High	Sequest HT (A2)	Unambiguous	GMVAAQHSLT		1	1	4EYL	4EYL	0	2	1	0	1	1	507.756	1014.51	1014.5	1.82	0.00092	HCD (High Energy Collision Dissociation)	MS2	34.8092	45	27.8131	14222	nR-GLU+Try_180322142308.raw	F18	2.51
		FALSE	High	Sequest HT (A2)	Unambiguous	GMVAAQHSLT		1	1	4EYL	4EYL	0	2	1	0	1	1	507.756	1014.5	1014.5	0.68	0.00035	HCD (High Energy Collision Dissociation)	MS2	0	45	24.769	12197	nR-GLU+Try_180322142308.raw	F18	2.47
		FALSE	High	Sequest HT (A2)	Unambiguous	GMVAAQHSLT		1	1	4EYL	4EYL	0	2	1	0	1	1	507.756	1014.51	1014.5	1.7	0.00086	HCD (High Energy Collision Dissociation)	MS2	27.3602	45	25.7768	12831	nR-GLU+Try_180322142308.raw	F18	2.34
		FALSE	High	Sequest HT (A2)	Unambiguous	GMVAAQHSLT		1	1	4EYL	4EYL	0	2	1	0	1	1	507.756	1014.5	1014.5	0.98	0.0005	HCD (High Energy Collision Dissociation)	MS2	48.2839	45	28.823	14947	nR-GLU+Try_180322142308.raw	F18	2.23
	FALSE	High	GGRVLVVDTA		1	1	2	4EYL	2	986.563	High	2.63
		Checked	Confidence	Identifying Node	PSM Ambiguity	Annotated Sequence	Modifications	# Protein Groups	# Proteins	Master Protein Accessions	Protein Accessions	# Missed Cleavages	Charge	DeltaScore	DeltaCn	Rank	Search Engine Rank	m/z [Da]	MH+ [Da]	Theo. MH+ [Da]	DeltaM [ppm]	Deltam/z [Da]	Activation Type	MS Order	Isolation Interference [%]	Ion Inject Time [ms]	RT [min]	First Scan	Spectrum File	File ID	XCorr
		FALSE	High	Sequest HT (A2)	Unambiguous	GGRVLVVDTA		1	1	4EYL	4EYL	2	2	1	0	1	1	493.785	986.564	986.563	0.74	0.00036	HCD (High Energy Collision Dissociation)	MS2	0	33.89	20.269	9047	nR-GLU+Try_180322142308.raw	F18	2.63
		FALSE	High	Sequest HT (A2)	Unambiguous	GGRVLVVDTA		1	1	4EYL	4EYL	2	2	1	0	1	1	493.786	986.565	986.563	2.41	0.00119	HCD (High Energy Collision Dissociation)	MS2	44.6491	26.491	21.2797	9727	nR-GLU+Try_180322142308.raw	F18	1.91
	FALSE	High	GGRVLVVDT		1	1	1	4EYL	2	915.526	High	2.46
		Checked	Confidence	Identifying Node	PSM Ambiguity	Annotated Sequence	Modifications	# Protein Groups	# Proteins	Master Protein Accessions	Protein Accessions	# Missed Cleavages	Charge	DeltaScore	DeltaCn	Rank	Search Engine Rank	m/z [Da]	MH+ [Da]	Theo. MH+ [Da]	DeltaM [ppm]	Deltam/z [Da]	Activation Type	MS Order	Isolation Interference [%]	Ion Inject Time [ms]	RT [min]	First Scan	Spectrum File	File ID	XCorr
		FALSE	High	Sequest HT (A2)	Unambiguous	GGRVLVVDT		1	1	4EYL	4EYL	2	2	1	0	1	1	458.267	915.526	915.526	0.2	9e-05	HCD (High Energy Collision Dissociation)	MS2	0	34.662	20.2926	9061	nR-GLU+Try_180322142308.raw	F18	2.46
	FALSE	High	GGRVLVVD		1	1	1	4EYL	1	814.478	High	1.9
		Checked	Confidence	Identifying Node	PSM Ambiguity	Annotated Sequence	Modifications	# Protein Groups	# Proteins	Master Protein Accessions	Protein Accessions	# Missed Cleavages	Charge	DeltaScore	DeltaCn	Rank	Search Engine Rank	m/z [Da]	MH+ [Da]	Theo. MH+ [Da]	DeltaM [ppm]	Deltam/z [Da]	Activation Type	MS Order	Isolation Interference [%]	Ion Inject Time [ms]	RT [min]	First Scan	Spectrum File	File ID	XCorr
		FALSE	High	Sequest HT (A2)	Unambiguous	GGRVLVVD		1	1	4EYL	4EYL	1	2	0.9158	0	1	1	407.743	814.479	814.478	1.13	0.00046	HCD (High Energy Collision Dissociation)	MS2	38.2949	30.865	19.4955	8520	nR-GLU+Try_180322142308.raw	F18	1.9
	FALSE	High	GAVASNGLIVRD		1	1	1	4EYL	1	1171.64	High	3.01
		Checked	Confidence	Identifying Node	PSM Ambiguity	Annotated Sequence	Modifications	# Protein Groups	# Proteins	Master Protein Accessions	Protein Accessions	# Missed Cleavages	Charge	DeltaScore	DeltaCn	Rank	Search Engine Rank	m/z [Da]	MH+ [Da]	Theo. MH+ [Da]	DeltaM [ppm]	Deltam/z [Da]	Activation Type	MS Order	Isolation Interference [%]	Ion Inject Time [ms]	RT [min]	First Scan	Spectrum File	File ID	XCorr
		FALSE	High	Sequest HT (A2)	Unambiguous	GAVASNGLIVRD		1	1	4EYL	4EYL	1	2	0.7641	0	1	1	586.327	1171.65	1171.64	3.67	0.00215	HCD (High Energy Collision Dissociation)	MS2	29.9504	27.956	21.0719	9560	nR-GLU+Try_180322142308.raw	F18	3.01
	FALSE	High	GAAFPKASMIVMSHSAPDSR		1	1	2	4EYL	2	2060.01	High	6.83
		Checked	Confidence	Identifying Node	PSM Ambiguity	Annotated Sequence	Modifications	# Protein Groups	# Proteins	Master Protein Accessions	Protein Accessions	# Missed Cleavages	Charge	DeltaScore	DeltaCn	Rank	Search Engine Rank	m/z [Da]	MH+ [Da]	Theo. MH+ [Da]	DeltaM [ppm]	Deltam/z [Da]	Activation Type	MS Order	Isolation Interference [%]	Ion Inject Time [ms]	RT [min]	First Scan	Spectrum File	File ID	XCorr
		FALSE	High	Sequest HT (A2)	Unambiguous	GAAFPKASMIVMSHSAPDSR		1	1	4EYL	4EYL	2	3	1	0	1	1	687.344	2060.02	2060.01	5.76	0.00396	HCD (High Energy Collision Dissociation)	MS2	63.4801	39.034	22.8938	11027	nR-GLU+Try_180322142308.raw	F18	6.83
		FALSE	High	Sequest HT (A2)	Unambiguous	GAAFPKASMIVMSHSAPDSR		1	1	4EYL	4EYL	2	2	1	0	1	1	1030.51	2060.02	2060.01	7.1	0.00732	HCD (High Energy Collision Dissociation)	MS2	56.7181	45	22.9528	11077	nR-GLU+Try_180322142308.raw	F18	4.03
	FALSE	High	GAAFPKASMIVMSHSAPD		1	1	2	4EYL	1	1816.87	High	3.74
		Checked	Confidence	Identifying Node	PSM Ambiguity	Annotated Sequence	Modifications	# Protein Groups	# Proteins	Master Protein Accessions	Protein Accessions	# Missed Cleavages	Charge	DeltaScore	DeltaCn	Rank	Search Engine Rank	m/z [Da]	MH+ [Da]	Theo. MH+ [Da]	DeltaM [ppm]	Deltam/z [Da]	Activation Type	MS Order	Isolation Interference [%]	Ion Inject Time [ms]	RT [min]	First Scan	Spectrum File	File ID	XCorr
		FALSE	High	Sequest HT (A2)	Unambiguous	GAAFPKASMIVMSHSAPD		1	1	4EYL	4EYL	1	2	1	0	1	1	908.942	1816.88	1816.87	2.05	0.00186	HCD (High Energy Collision Dissociation)	MS2	0	45	25.0679	12367	nR-GLU+Try_180322142308.raw	F18	3.74
		FALSE	High	Sequest HT (A2)	Unambiguous	GAAFPKASMIVMSHSAPD		1	1	4EYL	4EYL	1	3	1	0	1	1	606.295	1816.87	1816.87	-0.21	-0.00012	HCD (High Energy Collision Dissociation)	MS2	26.9898	30.095	25.0815	12375	nR-GLU+Try_180322142308.raw	F18	3.47
	FALSE	High	FGGCLIKD		1	1	1	4EYL	1	852.428	High	2.17
		Checked	Confidence	Identifying Node	PSM Ambiguity	Annotated Sequence	Modifications	# Protein Groups	# Proteins	Master Protein Accessions	Protein Accessions	# Missed Cleavages	Charge	DeltaScore	DeltaCn	Rank	Search Engine Rank	m/z [Da]	MH+ [Da]	Theo. MH+ [Da]	DeltaM [ppm]	Deltam/z [Da]	Activation Type	MS Order	Isolation Interference [%]	Ion Inject Time [ms]	RT [min]	First Scan	Spectrum File	File ID	XCorr
		FALSE	High	Sequest HT (A2)	Unambiguous	FGGCLIKD		1	1	4EYL	4EYL	1	2	1	0	1	1	426.718	852.43	852.428	1.49	0.00064	HCD (High Energy Collision Dissociation)	MS2	0	14.279	22.8871	11021	nR-GLU+Try_180322142308.raw	F18	2.17
	FALSE	High	KMGGMDALHAAGIATYA		1	1	1	4EYL	2	1677.81	High	1.99
		Checked	Confidence	Identifying Node	PSM Ambiguity	Annotated Sequence	Modifications	# Protein Groups	# Proteins	Master Protein Accessions	Protein Accessions	# Missed Cleavages	Charge	DeltaScore	DeltaCn	Rank	Search Engine Rank	m/z [Da]	MH+ [Da]	Theo. MH+ [Da]	DeltaM [ppm]	Deltam/z [Da]	Activation Type	MS Order	Isolation Interference [%]	Ion Inject Time [ms]	RT [min]	First Scan	Spectrum File	File ID	XCorr
		FALSE	High	Sequest HT (A2)	Unambiguous	KMGGMDALHAAGIATYA		1	1	4EYL	4EYL	2	2	1	0	1	1	839.411	1677.82	1677.81	4.1	0.00344	HCD (High Energy Collision Dissociation)	MS2	0	45	26.0163	12992	nR-GLU+Try_180322142308.raw	F18	1.99
	FALSE	High	YANALSNQLAPQE		1	1	1	4EYL	0	1418.69	High	2.16
		Checked	Confidence	Identifying Node	PSM Ambiguity	Annotated Sequence	Modifications	# Protein Groups	# Proteins	Master Protein Accessions	Protein Accessions	# Missed Cleavages	Charge	DeltaScore	DeltaCn	Rank	Search Engine Rank	m/z [Da]	MH+ [Da]	Theo. MH+ [Da]	DeltaM [ppm]	Deltam/z [Da]	Activation Type	MS Order	Isolation Interference [%]	Ion Inject Time [ms]	RT [min]	First Scan	Spectrum File	File ID	XCorr
		FALSE	High	Sequest HT (A2)	Unambiguous	YANALSNQLAPQE		1	1	4EYL	4EYL	0	2	1	0	1	1	709.85	1418.69	1418.69	1.67	0.00119	HCD (High Energy Collision Dissociation)	MS2	32.5681	16.102	23.6075	11550	nR-GLU+Try_180322142308.raw	F18	2.16
